# Supplementary material
Source: PubMed Central journal article supplement (PMC4580232)

# THE LANCET

## **Supplementary appendix**

This appendix formed part of the original submission and has been peer reviewed. We post it as supplied by the authors.

Supplement to: Singh JA, Cameron C, Noorbaloochi S, et al. Risk of serious infection in biological treatment of patients with rheumatoid arthritis: a systematic review and meta-analysis. *Lancet* 2015; published online May 12. [http://dx.doi.org/10.1016/S0140-6736\(14\)61704-9](http://dx.doi.org/10.1016/S0140-6736(14)61704-9).

## SUPPLEMENTARY APPENDIX

### Appendix 1 (on line): Search Strategy

#### Database: Cochrane Library, Issue 2, 2014

#### Description:

| ID  | Search                                                                                                                                                                                                  |
|-----|---------------------------------------------------------------------------------------------------------------------------------------------------------------------------------------------------------|
| #1  | MeSH descriptor: [Antibodies, Monoclonal] explode all trees                                                                                                                                             |
| #2  | MeSH descriptor: [Monokines] explode all trees                                                                                                                                                          |
| #3  | MeSH descriptor: [Receptors, Interleukin-1] explode all trees                                                                                                                                           |
| #4  | MeSH descriptor: [Receptors, Interleukin-6] explode all trees                                                                                                                                           |
| #5  | MeSH descriptor: [Immunoglobulin G] explode all trees                                                                                                                                                   |
| #6  | MeSH descriptor: [Immunoconjugates] explode all trees                                                                                                                                                   |
| #7  | MeSH descriptor: [Polyethylene Glycols] explode all trees                                                                                                                                               |
| #8  | MeSH descriptor: [Immunoglobulin Fab Fragments] explode all trees                                                                                                                                       |
| #9  | MeSH descriptor: [T-Lymphocytes] explode all trees                                                                                                                                                      |
| #10 | adalimumab:ti,ab                                                                                                                                                                                        |
| #11 | humira:ti,ab                                                                                                                                                                                            |
| #12 | trudexa:ti,ab                                                                                                                                                                                           |
| #13 | abatacept:ti,ab                                                                                                                                                                                         |
| #14 | orencia:ti,ab                                                                                                                                                                                           |
| #15 | anakinra:ti,ab                                                                                                                                                                                          |
| #16 | kineret:ti,ab                                                                                                                                                                                           |
| #17 | Certolizumab:ti,ab                                                                                                                                                                                      |
| #18 | cimzia:ti,ab                                                                                                                                                                                            |
| #19 | Etanercept:ti,ab                                                                                                                                                                                        |
| #20 | enbrel:ti,ab                                                                                                                                                                                            |
| #21 | Golimumab:ti,ab                                                                                                                                                                                         |
| #22 | simponi:ti,ab                                                                                                                                                                                           |
| #23 | rituximab:ti,ab                                                                                                                                                                                         |
| #24 | rituxan:ti,ab                                                                                                                                                                                           |
| #25 | mabthera:ti,ab                                                                                                                                                                                          |
| #26 | Tocilizumab:ti,ab                                                                                                                                                                                       |
| #27 | actemra:ti,ab                                                                                                                                                                                           |
| #28 | RoActemra:ti,ab                                                                                                                                                                                         |
| #29 | infliximab:ti,ab                                                                                                                                                                                        |
| #30 | remicade:ti,ab                                                                                                                                                                                          |
| #31 | (#1 or #2 or #3 or #4 or #5 or #6 or #7 or #8 or #9 or #10 or #11 or #12 or #13 or #14 or #15 or #16 or #17 or #18 or #19 or #20 or #21 or #22 or #23 or #24 or #25 or #26 or #27 or #28 or #29 or #30) |
| #32 | rheumatoid:ti,ab                                                                                                                                                                                        |
| #33 | arthritis:ti,ab                                                                                                                                                                                         |
| #34 | felty near/2 syndrome                                                                                                                                                                                   |
| #35 | caplan near/2 syndrome                                                                                                                                                                                  |
| #36 | rheumatoid nodule                                                                                                                                                                                       |
| #37 | sjogren* near/2 syndrome                                                                                                                                                                                |
| #38 | still* next disease                                                                                                                                                                                     |
| #39 | arthritis near/2 rheumat*                                                                                                                                                                               |

- #40 MeSH descriptor: [Arthritis, Rheumatoid] explode all trees
- #41 (#32 or #33 or #34 or #35 or #36 or #37 or #38 or #39 or #40)
- #42 #31 and #41

**Database: Ovid MEDLINE(R) In-Process & Other Non-Indexed Citations and Ovid MEDLINE(R) <1946 to 2014 February 11>**

**Search Strategy:**

- 
- 1 exp arthritis, rheumatoid/
  - 2 (arthritis adj2 rheumat\$).tw.
  - 3 (felty\$ adj2 syndrome).tw.
  - 4 (caplan\$ adj2 syndrome).tw.
  - 5 rheumatoid nodule.tw.
  - 6 (sjogren\$ adj2 syndrome).tw.
  - 7 still\$ disease.tw.
  - 8 or/1-7
  - 9 exp antibodies, monoclonal/
  - 10 exp monokines/ (117104)
  - 11 exp receptors, interleukin-1/
  - 12 exp receptors, interleukin-6/
  - 13 exp immunoglobulin g/
  - 14 exp immunoconjugates/
  - 15 exp polyethylene glycols
  - 16 exp immunoglobulin fab fragments/
  - 17 exp t-lymphocytes/
  - 18 Infliximab.tw.
  - 19 remicade.tw.
  - 20 adalimumab.tw.
  - 21 humira.tw.
  - 22 trudexa.tw.
  - 23 abatacept.tw.
  - 24 orenzia.tw.
  - 25 anakinra.tw.
  - 26 kineret.tw.
  - 27 Certolizumab.tw.
  - 28 cimzia.tw.
  - 29 Etanercept.tw.
  - 30 enbrel.tw.
  - 31 Golimumab.tw.
  - 32 simponi.tw.
  - 33 rituximab.tw.
  - 34 rituxan.tw.
  - 35 mabthera.tw.
  - 36 Tocilizumab.tw.
  - 37 actemra.tw.
  - 38 RoActemra.tw.
  - 39 or/9-36
  - 40 randomized controlled trial.pt.
  - 41 controlled clinical trial.pt.
  - 42 randomized.ab.

43 placebo.ab.  
44 clinical trials as topic.sh.  
45 randomly.ab.  
46 trial.ti.  
47 or/40-46  
48 exp animals/ not humans.sh.  
49 47 not 48  
50 8 and 39 and 49  
51 limit 50 to ed=20080101-20130507  
52 limit 50 to yr="2008 -Current"  
53 18 or 19  
54 8 and 39 and 53  
55 limit 54 to ed=20060101-20130507  
56 limit 54 to yr="2006 -Current"  
57 51 or 52  
58 55 or 56  
59 57 or 58

**Database: Embase Classic+Embase <1947 to 2014 February 11>  
Search Strategy:**

-----  
1 exp arthritis, rheumatoid/  
2 (arthritis adj2 rheumat\$).tw.  
3 (felty\$ adj2 syndrome).tw.  
4 (caplan\$ adj2 syndrome).tw.  
5 rheumatoid nodule.tw.  
6 (sjogren\$ adj2 syndrome).tw.  
7 still\$ disease.tw.  
8 or/1-7  
9 exp monoclonal antibody/  
10 exp monokine/  
11 exp interleukin 1 receptor/  
12 exp interleukin 6 receptor/  
13 exp antibody conjugate/  
14 exp immunoglobulin G/  
15 exp macrogol derivative/  
16 exp "immunoglobulin F(ab) fragment"/  
17 exp T lymphocyte/  
18 infliximab.mp. or exp infliximab/  
19 remicade.mp.  
20 humira.mp. or exp adalimumab/  
21 trudexa.mp.  
22 abatacept.mp. or exp abatacept/  
23 orenica.mp.  
24 anakinra.mp. or recombinant interleukin 1 receptor blocking agent/  
25 kineret.mp.  
26 cimzia.mp. or exp certolizumab pegol/  
27 enbrel.mp. or exp etanercept/  
28 simponi.mp. or exp golimumab/  
29 rituxan.mp. or exp rituximab/

- 30 mabthera.mp.
- 31 actemra.mp. or exp tocilizumab/
- 32 RoActemra.mp.
- 33 or/9-32
- 34 8 and 33
- 35 random:.tw.
- 36 placebo:.mp.
- 37 double-blind:.tw.
- 38 or/35-37
- 39 34 and 38

**Tofacitinib search**

**Search Name:            tofacitinib**  
**Description:**

- | ID | Search                                                                                                             |
|----|--------------------------------------------------------------------------------------------------------------------|
| #1 | (tofacitinib or tasocitinib) in Trials                                                                             |
| #2 | (cp690550 or "cp-690550" or "cp 690550" or "cp-690,550" or "cp 690,550" or "cp-690 550" or "cp 690 550") in Trials |
| #3 | (#1 or #2)                                                                                                         |
| #4 | (rheumat* near/5 arthrit*) in Trials                                                                               |
| #5 | MeSH descriptor: [Arthritis, Rheumatoid] explode all trees                                                         |
| #6 | (stills or still's or felty* or sjogren* or sicca* or sjoegren* or vasculit* or arthrit* or caplan*) in Trials     |
| #7 | (#4 or #5 or #6)                                                                                                   |
| #8 | (#3 and #7)                                                                                                        |

**Database: Ovid MEDLINE(R) In-Process & Other Non-Indexed Citations and Ovid MEDLINE(R) <1946 to 2014 February 11>**

**Search Strategy:**

- 
- 1 tofacitinib.mp.
  - 2 tasocitinib.mp.
  - 3 cp690550.mp.
  - 4 "cp 690550".mp.
  - 5 "cp 690 550".mp.
  - 6 or/1-5
  - 7 exp Arthritis, Rheumatoid/
  - 8 (rheumatoid adj5 arthrit\*).mp.
  - 9 (stills or still's or felty\* or sjogren\* or sicca\* or sjoegren\* or vasculit\* or arthrit\* or caplan\*).mp.
  - 10 or/7-9
  - 11 6 and 10

**Database: Embase Classic+Embase <1947 to 2014 February 11>  
Search Strategy:**

---

- 1 tofacitinib.mp.
- 2 tasocitinib.mp.
- 3 Xeljanz.mp.
- 4 cp690550.mp.
- 5 "cp 690550".mp.
- 6 "cp 690 550".mp.
- 7 or/1-5
- 8 exp Arthritis, Rheumatoid/
- 9 (rheumatoid adj5 arthrit\*).mp
- 10 (stills or still's or felty\* or sjogren\* or sicca\* or sjoegren\* or vasculit\* or arthrit\* or caplan\*).mp.
- 11 or/8-10
- 12 7 and 11

**Appendix 2 (on line):** Sensitivity analysis removing tofacitinib treatment nodes from the analysis

Tofacitinib was not pooled with other biologics but treated as a separate treatment node within the analysis (**Figure 2**). We included tofacitinib in the primary analysis as a separate node to improve precision and because we wanted this review to be up-to-date and include all relevant treatment options for the management of rheumatoid arthritis. This is particularly important because we want this review to be dynamic and updated as new information evolves over time, including information on newer treatments such as tofacitinib. However, we opted to not include effect estimates on the risk of serious infection for tofacitinib in the main text at this time because 1) tofacitinib was not the focus of this review; 2) we do not report effect estimates for individual biologics, 3) conclusions regarding tofacitinib and the risk of serious infection may be premature because comparisons for tofacitinib may be underpowered at this time (similar to individual biologics), and 4) we observed some inconsistency for studies which included tofacitinib (**Appendix 10**).

We investigated the impact of including tofacitinib in the analysis as a separate node by running an analysis where we remove tofacitinib studies from the evidence network. Inclusion of tofacitinib in the evidence network had negligible impact on results (Table 1a) but allows us to easily update our analysis as new information become available. Results were nearly identical in analyses with and without tofacitinib, although inclusion of tofacitinib did result in a very small reduction in the between study standard deviation (0.1513 vs. 0.1524) and an increase in the number of studies (106 vs.98), patients (42,330 vs. 38,527), and patients who had a serious infection (965 vs. 934).

**Appendix 2a – Comparison of effect estimates from Primary analysis and analysis removing tofacitinib from the evidence network**

| <u>Comparison</u>                                                                       | <u>Primary Analysis</u> | <u>Sensitivity analysis removing tofacitinib</u> |
|-----------------------------------------------------------------------------------------|-------------------------|--------------------------------------------------|
| <b>Combination or triple traditional DMARD therapy vs Traditional DMARD monotherapy</b> | 0.84(0.48,1.48)         | 0.85(0.49,1.51)                                  |
| <b>SD Biologic +/- Traditional DMARD vs Traditional DMARD monotherapy</b>               | <b>1.31(1.09,1.58)</b>  | <b>1.31(1.10,1.59)</b>                           |
| <b>LD Biologic +/- Traditional DMARD vs Traditional DMARD monotherapy</b>               | 0.93(0.65,1.33)         | 0.94(0.64,1.33)                                  |
| <b>HD Biologic +/- Traditional DMARD vs Traditional DMARD monotherapy</b>               | <b>1.9(1.50,2.39)</b>   | <b>1.89(1.50,2.38)</b>                           |
| <b>Combination Biologic vs Traditional DMARD monotherapy</b>                            | <b>4.14(1.87,9.05)</b>  | <b>4.17(1.90,9.16)</b>                           |
| <b>Placebo vs SD Biologic +/- Traditional DMARD</b>                                     | 0.57(0.19,1.28)         | 0.37(0.10,1.03)                                  |
| <b>Number of trials</b>                                                                 | 106                     | 98                                               |
| <b>No. of patients in trials</b>                                                        | 42,330                  | 38,527                                           |
| <b>No. of patients with serious infection</b>                                           | 965                     | 934                                              |
| <b>Residual deviance</b>                                                                | <b>225.6 vs 265</b>     | <b>207.3 vs 237</b>                              |
| <b>DIC</b>                                                                              | <b>1040.87</b>          | <b>953.69</b>                                    |
| <b>Between study standard deviation</b>                                                 | <b>0.1513</b>           | <b>0.1524</b>                                    |

## Appendix 3 (on line): Methods Supplement

### Data Extraction – Patient and study characteristics

The following patient and study characteristics were extracted: Patient characteristics (age, RA duration); prior DMARD/biologic treatment (MTX naïve, MTX-experienced, non-MTX traditional DMARD experienced, or TNF-experienced); study characteristics (year and month of publication, length of follow-up, adaptive design); risk of bias in individual RCTs using the risk of bias tool as recommended by the Cochrane Collaboration (sequence generation, allocation concealment, blinding, incomplete outcome data, and selective outcome reporting), rating each item with (low, high or unclear bias) and each trial with an overall risk of bias in terms of low risk (low for all key domains), high risk (high for  $\geq 1$  key domains), and unclear risk (unclear for  $\geq 1$  key domains); intervention (type, dose and duration, concomitant MTX therapy and dose, monotherapy versus combination therapy; and comparator characteristics (placebo or active comparator with details on type, dose, concomitant methotrexate therapy, monotherapy versus combination therapy. The dose classification of each biologic is provided below. Doses above these doses were classified as high dose biologics and those below were classified as low dose biologics.

#### Appendix 3a. Dose classification of each biologic

| Drug         | Standard approved U.S. dose                                                                                                                                                                                                                                                                                                                                                                                                                                           |
|--------------|-----------------------------------------------------------------------------------------------------------------------------------------------------------------------------------------------------------------------------------------------------------------------------------------------------------------------------------------------------------------------------------------------------------------------------------------------------------------------|
| Infliximab   | 3mg/kg intravenous every 8 weeks after initial dosing at 0, 2 and 6 weeks                                                                                                                                                                                                                                                                                                                                                                                             |
| Etanercept   | 25 mg subcutaneous twice weekly                                                                                                                                                                                                                                                                                                                                                                                                                                       |
| Adalimumab   | 40 mg subcutaneous every 2 weeks                                                                                                                                                                                                                                                                                                                                                                                                                                      |
| Golimumab    | SQ: 50 mg subcutaneous every 4 weeks<br><br>IV: 2 mg/kg given as an intravenous infusion at weeks 0 and 4, then every 8 weeks                                                                                                                                                                                                                                                                                                                                         |
| Certolizumab | 400 mg (given as two subcutaneous injections of 200 mg) initially and at Weeks 2 and 4, followed by 200 mg every other week. For maintenance dosing, 400 mg every 4 weeks can be considered.                                                                                                                                                                                                                                                                          |
| Anakinra     | 100 mg subcutaneous every day                                                                                                                                                                                                                                                                                                                                                                                                                                         |
| Abatacept    | IV: (10 mg/kg every 4 weeks): every 4 weeks intravenously at 500 mg dose in patients <60 kg, 750 mg in patients 60-100 kg and 1000 mg in patients >100 kg, after the initial dosing regimen of baseline, 2 and 4-week infusions;<br><br>SQ: After a single intravenous infusion as a loading dose (as per body weight categories above), 125 mg administered by a subcutaneous injection should be given within a day, followed by 125 mg subcutaneously once a week. |
| Tocilizumab  | 4 mg/kg intravenously every 4 weeks followed by an increase to 8 mg/kg based on clinical response                                                                                                                                                                                                                                                                                                                                                                     |
| Rituximab    | Two 1000 mg IV doses 2 weeks apart                                                                                                                                                                                                                                                                                                                                                                                                                                    |
| Tofacitinib  | 5 mg bid PO                                                                                                                                                                                                                                                                                                                                                                                                                                                           |

#### Assessment of model fit, convergence and inconsistency



Assessment of model fit was based on deviance information criterion (DIC) and comparison of residual deviance.<sup>1</sup> To ensure convergence was reached, trace plots and the Brooks-Gelman-Rubin statistic were assessed.<sup>1</sup> Three chains were fit in WinBUGS for each analysis, with at least 40,000 iterations, and a burn-in of at least 40,000 iterations.<sup>1</sup> To assess consistency (there is no conflict between direct and indirect evidence),<sup>2</sup> we compared deviance and DIC statistics in fitted consistency and inconsistency models.<sup>2</sup> We also plotted the posterior mean deviance of the individual data points in the inconsistency model against their posterior mean deviance in the consistency model to identify where inconsistency is present.

### **Assessment of Publication Bias**

We assessed the publication bias for standard dose biologic versus non-biologic treatments by evaluating a funnel plot of the trial mean differences for asymmetry. The symmetry of such 'funnel plots' was assessed both visually, and formally with Egger's test.

### **Pre-specified sub-group and sensitivity analyses**

We also pre-specified the following analyses: (1) MTX-naïve, MTX experienced (inadequate responders/failures) and TNF-experienced populations; (2) Anti-TNF biologics vs. other biologic; (3) individual biologics; (4) treatment duration with biologics: short (<6 months), intermediate duration (6 to 12 months) or long-duration (>1 year); (5) RA disease duration: categorized as early RA defined as duration of less than 2 years<sup>3</sup> vs. established RA, duration 2 to 10 years vs. late RA defined as >10 years.<sup>4</sup> Finally, we conducted detailed statistical analyses to ensure that findings were robust to type of analysis performed and assumptions around how to handle cells with zero events.

### **Handling Zero Cells**

We also conducted numerous sensitivity analyses related to methods for handling zero cells.<sup>5,6</sup> We conducted numerous analyses to ensure robustness of results irrespective of how zeroes were handled (**Appendix 6**). We also did not exclude double/multiple zeroes cells to provide analytic consistency and because exclusion may cause an artificial small increase the effect size of serious infection.<sup>5</sup> Finally, since treatment arms within some studies have differential sample size, we did not apply a constant 0.5 continuity correction which would have biased estimates but instead applied an adjusted continuity correction factor centered around 0.5 and accounting for differential sample sizes among the arms.<sup>6</sup>

### **Role of Funding**

This research was supported through grants from Rheumatology division at the University of Alabama at Birmingham. The funding agency played no role in study design, collection, analysis, interpretation of data, writing of the manuscript, or in the decision to submit the paper for publication. They accept no responsibility for the contents.

### **References**

1. Spiegelhalter, D., Thomas, A. & Best, N. WinBUGS user manual. MRC Biostat. Unit 2, (2004).

2. Dias, S., Welton, N.J., Sutton, A.J., et al. NICE Technical Support Document 4: Inconsistency in Networks of Evidence Based on Randomised Controlled Trials. 1–39 (2011). at [www.nicedsu.org.uk](http://www.nicedsu.org.uk)
3. Boers M. Rheumatoid arthritis. Treatment of early disease. *Rheumatic diseases clinics of North America* 2001;27:405-14.
4. Singh JA, Christensen R, Wells GA, et al. Biologics for rheumatoid arthritis: an overview of Cochrane reviews (Protocol). *Cochrane Database of Systematic Reviews* 2009.
5. Bradburn MJ, Deeks JJ, Berlin JA, Russell Localio A. Much ado about nothing: a comparison of the performance of meta-analytical methods with rare events. *Statistics in medicine* 2007; **26**(1): 53-77.
6. Friedrich JO, Adhikari NK, Beyene J. Inclusion of zero total event trials in meta-analyses maintains analytic consistency and incorporates all available data. *BMC medical research methodology* 2007; **7**: 5.

## Appendix 4 (on line): Summary of Included Trials

| Author and Year  | N   | Patient Population | Treatment 1                   | Treatment 2                          | Treatment 3                          | Treatment 4                       | Treatment 5 | MTX    | Duration of RA | Biologic-naive | DMARD-naive | Mono-Biologic | TIME of Outcome abstracted | Trial Duration |
|------------------|-----|--------------------|-------------------------------|--------------------------------------|--------------------------------------|-----------------------------------|-------------|--------|----------------|----------------|-------------|---------------|----------------------------|----------------|
| Abe 2006         | 147 | MTX experienced    | Traditional DMARD monotherapy | SD Biologic +/- Traditional DMARD    | HD Biologic +/- Traditional DMARD    | NA                                | NA          | 7.5-30 | 7.9            | yes            | no          | yes           | 3 months                   | 3 months       |
| Batho (ERA) 2000 | 632 | MTX naïve          | Traditional DMARD monotherapy | SD Biologic +/- Traditional DMARD    | LD Biologic +/- Traditional DMARD    | NA                                | NA          | 7.5-30 | 1              | no             | no          | yes           | 24 months                  | 24 months      |
| Bejarano 2008    | 148 | MTX naïve          | Traditional DMARD monotherapy | SD Biologic +/- Traditional DMARD    | NA                                   | NA                                | NA          | 7.5-30 | 0.7            | yes            | no          | yes           | 13 months                  | 13 months      |
| Breedveld 2006   | 799 | MTX naïve          | Traditional DMARD monotherapy | SD Biologic +/- Traditional DMARD    | NA                                   | NA                                | NA          | 7.5-30 | 0.8            | yes            | no          | yes           | 24 months                  | 24 months      |
| Bresnihan 1998   | 472 | DMARD experienced  | Traditional DMARD monotherapy | SD Biologic +/- Traditional DMARD    | LD Biologic +/- Traditional DMARD    | HD Biologic +/- Traditional DMARD | NA          | n/a    | 3.9            | yes            | no          | yes           | 6 months                   | 6 months       |
| Burmester 2013   | 399 | TNF experienced    | Traditional DMARD monotherapy | SD Tofacitinib +/- Traditional DMARD | HD Tofacitinib +/- Traditional DMARD | NA                                | NA          | 7.5-30 | 12.3           | no             | no          | yes           | 6 months                   | 6 months       |
| Chen 2009        | 47  | DMARD experienced  | Traditional DMARD monotherapy | SD Biologic +/- Traditional DMARD    | NA                                   | NA                                | NA          | 7.5-30 | 6              | no             | no          | yes           | 3 months                   | 3 months       |
| Choy 2012        | 247 | MTX experienced    | Traditional DMARD monotherapy | HD Biologic +/- Traditional DMARD    | NA                                   | NA                                | NA          | 7.5-30 | 9.7            | no?            | no          | yes           | 6 months                   | 6 months       |
| Cohen 2004       | 501 | MTX experienced    | Traditional DMARD monotherapy | SD Biologic +/- Traditional DMARD    | NA                                   | NA                                | NA          | 7.5-30 | 11.5           | yes            | no          | yes           | 6 months                   | 12 months      |
| Cohen 2002       | 137 | MTX                | Traditional                   | LD Biologic                          | NA                                   | NA                                | NA          | 7.5-30 | 7.4            | yes            | no          | yes           | 6 months                   | 6 months       |

| Author and Year              | N   | Patient Population | Treatment 1                   | Treatment 2                                     | Treatment 3                       | Treatment 4 | Treatment 5 | MTX    | Duration of RA | Biologic-naive | DMARD-naive | Mono-Biologic | TIME of Outcome abstracted | Trial Duration |
|------------------------------|-----|--------------------|-------------------------------|-------------------------------------------------|-----------------------------------|-------------|-------------|--------|----------------|----------------|-------------|---------------|----------------------------|----------------|
|                              |     |                    | monotherapy                   | DMARD                                           |                                   |             |             |        |                |                |             |               |                            |                |
| <b>Cohen 2006</b>            | 520 | TNF experienced    | Traditional DMARD monotherapy | SD Biologic +/- Traditional DMARD               | NA                                | NA          | NA          | 7.5-30 | 12.1           | no             | no          | yes           | 6 months                   | 24 months      |
| <b>Combe 2009</b>            | 254 | DMARD experienced  | Traditional DMARD monotherapy | SD Biologic +/- Traditional DMARD               | NA                                | NA          | NA          | n/a    | 5.6            | no             | no          | yes           | 24 months                  | 24 months      |
| <b>Conaghan 2013</b>         | 50  | MTX experienced    | Traditional DMARD monotherapy | SD Biologic +/- Traditional DMARD               | NA                                | NA          | NA          | 7.5-30 | 2.2            | 0              | 0           | yes           | 4 months                   | 12 months      |
| <b>de Jong 2013</b>          | 179 | MTX naïve          | Traditional DMARD monotherapy | Combination or triple traditional DMARD therapy | NA                                | NA          | NA          | 7.5-30 | 0.4            | no             | no          | yes           | 3 months                   | 3 months       |
| <b>Detert 2013</b>           | 172 | MTX naïve          | Traditional DMARD monotherapy | SD Biologic +/- Traditional DMARD               | NA                                | NA          | NA          | 7.5-30 | 0.14           | yes            | yes         | yes           | 6 months                   | 11 months      |
| <b>Dougados 1999</b>         | 137 | MTX naïve          | Traditional DMARD monotherapy | MTX + non-MTX traditional DMARD                 | NA                                | NA          | NA          | 7.5-30 | 0.2            | no             | no          | yes           | 12 months                  | 12 months      |
| <b>Durez 2007</b>            | 29  | MTX naïve          | Traditional DMARD monotherapy | SD Biologic +/- Traditional DMARD               | NA                                | NA          | NA          | 7.5-30 | 0.4            | no             | no          | yes           | 12 months                  | 12 months      |
| <b>Edwards 2004</b>          | 120 | MTX experienced    | Traditional DMARD monotherapy | SD Biologic +/- Traditional DMARD               | NA                                | NA          | NA          | 7.5-31 | 10.4           | yes            | no          | yes           | 6 months                   | 12 months      |
| <b>Emery (RADIATE) 2008a</b> | 498 | TNF experienced    | Traditional DMARD monotherapy | SD Biologic +/- Traditional DMARD               | HD Biologic +/- Traditional DMARD | NA          | NA          | 7.5-30 | 12.6           | no             | no          | yes           | 4 months                   | 6 months       |
| <b>Emery (COMET) 2008</b>    | 542 | MTX naïve          | Traditional DMARD monotherapy | SD Biologic +/- Traditional DMARD               | NA                                | NA          | NA          | 7.5-30 | 0.7            | yes            | no          | yes           | 12 months                  | 24 months      |

| Author and Year                     | N    | Patient Population | Treatment 1                          | Treatment 2                          | Treatment 3                          | Treatment 4 | Treatment 5 | MTX    | Duration of RA | Biologic-naive | DMARD-naive | Mono-Biologic | TIME of Outcome abstracted | Trial Duration |
|-------------------------------------|------|--------------------|--------------------------------------|--------------------------------------|--------------------------------------|-------------|-------------|--------|----------------|----------------|-------------|---------------|----------------------------|----------------|
| <b>Emery (DANCER) 2006</b>          | 483  | DMARD experienced  | Traditional DMARD monotherapy        | SD Biologic +/- Traditional DMARD    | LD Biologic +/- Traditional DMARD    | NA          | NA          | 7.5-30 | 10.8           | no             | no          | yes           | 6 months                   | 6 months       |
| <b>Emery (GO-BEFORE) 2009</b>       | 637  | MTX naïve          | Traditional DMARD monotherapy        | SD Biologic +/- Traditional DMARD    | HD Biologic +/- Traditional DMARD    | NA          | NA          | 7.5-30 | 3.5            | no             | no          | yes           | 6 months                   | 12 months      |
| <b>EMERY (SERENE) 2010a</b>         | 512  | MTX experienced    | Traditional DMARD monotherapy        | SD Biologic +/- Traditional DMARD    | LD Biologic +/- Traditional DMARD    | NA          | NA          | 7.5-30 | 7.1            | yes            | no          | yes           | 6 months                   | 11 months      |
| <b>Fleischman 2003</b>              | 1399 | DMARD experienced  | Traditional DMARD monotherapy        | SD Biologic +/- Traditional DMARD    | NA                                   | NA          | NA          | n/a    | 10.2           | yes            | no          | yes           | 6 months                   | 6 months       |
| <b>Fleischman_March 2012</b>        | 331  | DMARD experienced  | SD Tofacitinib +/- Traditional DMARD | LD Tofacitinib +/- Traditional DMARD | HD Tofacitinib +/- Traditional DMARD | Placebo     | NA          | 7.5-30 | 8.1            | no?            | no          | no            | 3 months                   | 6 months       |
| <b>Fleischmann (FAST4WARD) 2009</b> | 220  | DMARD experienced  | SD Biologic +/- Traditional DMARD    | Placebo                              | NA                                   | NA          | NA          | n/a    | 8.7            | no             | no          | yes           | 6 months                   | 6 months       |
| <b>Fleischmann_August 2012</b>      | 610  | DMARD experienced  | SD Tofacitinib +/- Traditional DMARD | HD Tofacitinib +/- Traditional DMARD | Placebo                              | NA          | NA          | 7.5-30 | 8.1            | no?            | no          | yes           | 3 months                   | 6 months       |
| <b>Furst 2003</b>                   | 636  | DMARD experienced  | Traditional DMARD monotherapy        | SD Biologic +/- Traditional DMARD    | NA                                   | NA          | NA          | n/a    | 9.3            | yes            | no          | yes           | 6 months                   | 6 months       |
| <b>Gabay (ADACTA) 2013</b>          | 326  | MTX experienced    | Traditional DMARD monotherapy        | HD Biologic +/- Traditional DMARD    | NA                                   | NA          | NA          | n/a    | 6.8            | yes            | no          | yes           | 6 months                   | 6 months       |
| <b>Genovese (TOWARD) 2008</b>       | 1220 | DMARD experienced  | Traditional DMARD                    | HD Biologic +/- Traditional          | NA                                   | NA          | NA          | 7.5-30 | 9.8            | yes            | no          | yes           | 6 months                   | 6 months       |

| Author and Year                                 | N   | Patient Population | Treatment 1                   | Treatment 2                                     | Treatment 3 | Treatment 4 | Treatment 5 | MTX    | Duration of RA | Biologic-naive | DMARD-naive | Mono-Biologic | TIME of Outcome abstracted | Trial Duration |
|-------------------------------------------------|-----|--------------------|-------------------------------|-------------------------------------------------|-------------|-------------|-------------|--------|----------------|----------------|-------------|---------------|----------------------------|----------------|
|                                                 |     |                    | monotherapy                   | DMARD                                           |             |             |             |        |                |                |             |               |                            |                |
| <b>Genovese 2004</b>                            | 241 | MTX experienced    | Traditional DMARD monotherapy | Combination Biologic                            | NA          | NA          | NA          | 7.5-30 | 9.9            | no             | no          | no            | 6 months                   | 6 months       |
| <b>Genovese 2005</b>                            | 391 | TNF experienced    | Traditional DMARD monotherapy | SD Biologic +/- Traditional DMARD               | NA          | NA          | NA          | no     | 12.2           | no             | no          | yes           | 6 months                   | 6 months       |
| <b>Greenwald 2011*</b>                          | 54  | TNF experienced    | Traditional DMARD monotherapy | Combination Biologic                            | NA          | NA          | NA          | 7.5-30 | 10.4           | no             | no          | no            | 6 months                   | 6 months       |
| <b>Haagsma 1994</b>                             | 40  | MTX experienced    | Traditional DMARD monotherapy | Combination or triple traditional DMARD therapy | NA          | NA          | NA          | 7.5-30 | 5              | no             | no          | yes           | 5.5 months                 | 5.5 months     |
| <b>Haagsma 1997</b>                             | 71  | MTX naïve          | Traditional DMARD monotherapy | Combination or triple traditional DMARD therapy | NA          | NA          | NA          | 7.5-30 | 0.3            | no             | no          | yes           | 12 months                  | 12 months      |
| <b>Hanyu 1999</b>                               | 37  | MTX experienced    | Traditional DMARD monotherapy | Combination or triple traditional DMARD therapy | NA          | NA          | NA          | 7.5-30 | 13.5           | no             | no          | yes           | 60 months                  | 60 months      |
| <b>Heijde (TEMPO Pt reported outcomes) 2007</b> | 682 | DMARD experienced  | Traditional DMARD monotherapy | SD Biologic +/- Traditional DMARD               | NA          | NA          | NA          | 7.5-30 | 6.4            | yes            | no          | yes           | 36 months                  | 36 months      |
| <b>Hetland 2006</b>                             | 160 | MTX naïve          | Traditional DMARD monotherapy | Combination or triple traditional DMARD therapy | NA          | NA          | NA          | 7.5-30 | 0.3            | no             | no          | yes           | 12 months                  | 12 months      |
| <b>Ichikawa 2005</b>                            | 47  | MTX naïve          | Traditional DMARD monotherapy | Combination or triple traditional DMARD         | NA          | NA          | NA          | 7.5-30 | 0.8            | no             | no          | yes           | 22 months                  | 22 months      |

| Author and Year            | N    | Patient Population | Treatment 1                             | Treatment 2                       | Treatment 3                       | Treatment 4 | Treatment 5 | MTX    | Duration of RA | Biologic-naive | DMARD-naive | Mono-Biologic | TIME of Outcome abstracted | Trial Duration |
|----------------------------|------|--------------------|-----------------------------------------|-----------------------------------|-----------------------------------|-------------|-------------|--------|----------------|----------------|-------------|---------------|----------------------------|----------------|
| therapy                    |      |                    |                                         |                                   |                                   |             |             |        |                |                |             |               |                            |                |
| Jones 2010                 | 572  | TNF experienced    | Traditional DMARD monotherapy           | HD Biologic +/- Traditional DMARD | NA                                | NA          | NA          | 7.5-30 | 6.4            | yes            | no          | yes           | 6 months                   | 6 months       |
| Kaine 2011                 | 120  | MTX experienced    | Traditional DMARD monotherapy           | SD Biologic +/- Traditional DMARD | NA                                | NA          | NA          | <=10   | 6.6            | no             | no          | yes           | 4 months                   | 9 months       |
| Kavanaugh (OPTIMA) 2013    | 1032 | MTX naïve          | Traditional DMARD monotherapy           | SD Biologic +/- Traditional DMARD | NA                                | NA          | NA          | 7.5-30 | 0.3            | yes            | no          | yes           | 6 months                   | 6 months       |
| Kay 2008                   | 104  | MTX experienced    | Traditional DMARD monotherapy           | SD Biologic +/- Traditional DMARD | HD Biologic +/- Traditional DMARD | NA          | NA          | 7.5-30 | 7.8            | no             | no          | yes           | 4 months                   | 11 months      |
| Keystone (GO-FORWARD) 2010 | 444  | MTX experienced    | Traditional DMARD monotherapy           | SD Biologic +/- Traditional DMARD | HD Biologic +/- Traditional DMARD | NA          | NA          | 7.5-31 | 5.9            | no             | no          | yes           | 4 months                   | 12 months      |
| Keystone 2004              | 619  | MTX experienced    | Traditional DMARD monotherapy           | SD Biologic +/- Traditional DMARD | LD Biologic +/- Traditional DMARD | NA          | NA          | 7.5-30 | 11             | yes            | no          | yes           | 12 months                  | 12 months      |
| Keystone 2004              | 420  | MTX experienced    | Traditional DMARD monotherapy           | SD Biologic +/- Traditional DMARD | NA                                | NA          | NA          | 7.5-30 | 8.9            | no             | no          | yes           | 4 months                   | 4 months       |
| Keystone 2008              | 982  | MTX experienced    | Traditional DMARD monotherapy           | SD Biologic +/- Traditional DMARD | HD Biologic +/- Traditional DMARD | NA          | NA          | 7.5-30 | 6.2            | no             | no          | no            | 6 months                   | 12 months      |
| Kim 2007                   | 128  | DMARD experienced  | Traditional DMARD monotherapy           | SD Biologic +/- Traditional DMARD | NA                                | NA          | NA          | 7.5-30 | 6.8            | yes            | no          | yes           | 6 months                   | 6 months       |
| Kim 2012                   | 300  | MTX experienced    | Combination or triple traditional DMARD | SD Biologic +/- Traditional DMARD | NA                                | NA          | NA          | 7.5-30 | 6.7            | yes            | no          | yes           | 4 months                   | 4 months       |

| Author and Year | N    | Patient Population | Treatment 1                   | Treatment 2                                     | Treatment 3                          | Treatment 4                          | Treatment 5 | MTX    | Duration of RA | Biologic-naive | DMARD-naive | Mono-Biologic | TIME of Outcome abstracted | Trial Duration |
|-----------------|------|--------------------|-------------------------------|-------------------------------------------------|--------------------------------------|--------------------------------------|-------------|--------|----------------|----------------|-------------|---------------|----------------------------|----------------|
| therapy         |      |                    |                               |                                                 |                                      |                                      |             |        |                |                |             |               |                            |                |
| Kremer 2002     | 263  | MTX experienced    | Traditional DMARD monotherapy | Combination or triple traditional DMARD therapy | NA                                   | NA                                   | NA          | 7.5-30 | 11.6           | no             | no          | yes           | 5.5 months                 | 5.5 months     |
| Kremer 2005     | 339  | DMARD experienced  | Traditional DMARD monotherapy | SD Biologic +/- Traditional DMARD               | LD Biologic +/- Traditional DMARD    | NA                                   | NA          | 7.5-30 | 9.7            | no             | no          | yes           | 6 months                   | 12 months      |
| Kremer 2006     | 652  | MTX experienced    | Traditional DMARD monotherapy | SD Biologic +/- Traditional DMARD               | NA                                   | NA                                   | NA          | 7.5-30 | 8.7            | no             | no          | yes           | 12 months                  | 12 months      |
| Kremer 2009     | 195  | TNF experienced    | Traditional DMARD monotherapy | SD Tofacitinib +/- Traditional DMARD            | HD Tofacitinib +/- Traditional DMARD | NA                                   | NA          | n/a    | 8.7            | no             | no          | yes           | 2 months                   | 3 months       |
| Kremer 2010     | 645  | MTX experienced    | Traditional DMARD monotherapy | SD Biologic +/- Traditional DMARD               | LD Biologic +/- Traditional DMARD    | NA                                   | NA          | 7.5-30 | 7.9            | no             | no          | yes           | 4 months                   | 11 months      |
| Kremer 2010     | 1190 | MTX experienced    | Traditional DMARD monotherapy | SD Biologic +/- Traditional DMARD               | HD Biologic +/- Traditional DMARD    | NA                                   | NA          | 7.5-30 | 9.2            | no             | no          | yes           | 12 months                  | 24 months      |
| Kremer 2012     | 442  | MTX experienced    | Traditional DMARD monotherapy | SD Tofacitinib +/- Traditional DMARD            | LD Tofacitinib +/- Traditional DMARD | HD Tofacitinib +/- Traditional DMARD | NA          | 7.5-30 | 9.6            | no             | no          | yes           | 3 months                   | 6 months       |
| Kremer 2013     | 795  | DMARD Experienced  | Traditional DMARD monotherapy | SD Tofacitinib +/- Traditional DMARD            | HD Tofacitinib +/- Traditional DMARD | NA                                   | NA          | n/a    | 8.9            | no             | no          | yes           | 3 months                   | 12 months      |
| Lan 2004        | 58   | MTX                | Traditional DMARD             | SD Biologic +/- Traditional                     | NA                                   | NA                                   | NA          | 7.5-30 | 8.5            | no             | no          | yes           | 3 months                   | 3 months       |



| Author and Year                 | N   | Patient Population | Treatment 1                       | Treatment 2                                     | Treatment 3                       | Treatment 4                       | Treatment 5 | MTX    | Duration of RA | Biologic-naive | DMARD-naive | Mono-Biologic | TIME of Outcome abstracted | Trial Duration |
|---------------------------------|-----|--------------------|-----------------------------------|-------------------------------------------------|-----------------------------------|-----------------------------------|-------------|--------|----------------|----------------|-------------|---------------|----------------------------|----------------|
|                                 |     | experienced        | monotherapy                       | DMARD                                           |                                   |                                   |             |        |                |                |             |               |                            |                |
| <b>Lipsky 2000</b>              | 261 | MTX experienced    | Traditional DMARD monotherapy     | SD Biologic +/- Traditional DMARD               | HD Biologic +/- Traditional DMARD | NA                                | NA          | 7.5-30 | 10             | yes            | no          | yes           | 12 months                  | 12 months      |
| <b>Maini (CHARISMA) 2006</b>    | 359 | MTX experienced    | Traditional DMARD monotherapy     | SD Biologic +/- Traditional DMARD               | LD Biologic +/- Traditional DMARD | HD Biologic +/- Traditional DMARD | NA          | 7.5-30 | 9.6            | no             | no          | yes           | 5 months                   | 5 months       |
| <b>Maini 1998</b>               | 101 | MTX experienced    | Traditional DMARD monotherapy     | SD Biologic +/- Traditional DMARD               | LD Biologic +/- Traditional DMARD | HD Biologic +/- Traditional DMARD | NA          | 7.5-30 | 10             | yes            | no          | yes           | 6 months                   | 6 months       |
| <b>Marchesoni 2003</b>          | 58  | MTX naive          | Traditional DMARD monotherapy     | Combination or triple traditional DMARD therapy | NA                                | NA                                | NA          | 7.5-30 | 0.9            | no             | no          | yes           | 12 months                  | 12 months      |
| <b>Miyasaka (CHANGE) 2008</b>   | 352 | DMARD experienced  | SD Biologic +/- Traditional DMARD | LD Biologic +/- Traditional DMARD               | HD Biologic +/- Traditional DMARD | Placebo                           | NA          | n/a    | 9.9            | yes            | no          | yes           | 6 months                   | 6 months       |
| <b>Moreland (TEAR) 2012</b>     | 500 | MTX naive          | Traditional DMARD monotherapy     | Combination or triple traditional DMARD therapy | SD Biologic +/- Traditional DMARD | NA                                | NA          | 7.5-30 | 0.3            | yes            | yes         | yes           | 6 months                   | 6 months       |
| <b>Nishimoto (SAMURAI) 2007</b> | 306 | DMARD experienced  | Traditional DMARD monotherapy     | HD Biologic +/- Traditional DMARD               | NA                                | NA                                | NA          | <=10   | 2.4            | no             | no          | yes           | 12 months                  | 12 months      |
| <b>Nishimoto (SATORI) 2009</b>  | 127 | MTX experienced    | Traditional DMARD monotherapy     | HD Biologic +/- Traditional DMARD               | NA                                | NA                                | NA          | <=10   | 8.6            | yes            | no          | yes           | 6 months                   | 6 months       |
| <b>O'Dell 1996</b>              | 102 | MTX experienced    | Traditional DMARD monotherapy     | Combination or triple traditional DMARD         | NA                                | NA                                | NA          | 7.5-30 | 8.6            | no             | no          | yes           | 24 months                  | 24 months      |

| Author and Year         | N   | Patient Population | Treatment 1                                     | Treatment 2                                     | Treatment 3                       | Treatment 4 | Treatment 5 | MTX    | Duration of RA | Biologic-naive | DMARD-naive | Mono-Biologic | TIME of Outcome abstracted | Trial Duration |
|-------------------------|-----|--------------------|-------------------------------------------------|-------------------------------------------------|-----------------------------------|-------------|-------------|--------|----------------|----------------|-------------|---------------|----------------------------|----------------|
| therapy                 |     |                    |                                                 |                                                 |                                   |             |             |        |                |                |             |               |                            |                |
| O'Dell 2006             | 48  | MTX naïve          | Traditional DMARD monotherapy                   | Combination or triple traditional DMARD therapy | NA                                | NA          | NA          | 7.5-30 | 0.4            | no             | no          | yes           | 24 months                  | 24 months      |
| O'Dell 2013             | 441 | MTX experienced    | Combination or triple traditional DMARD therapy | SD Biologic +/- Traditional DMARD               | NA                                | NA          | NA          | 7.5-30 | 5.2            | yes            | no          | yes           | 6 months                   | 12 months      |
| Ogrendik 2007           | 76  | MTX experienced    | Traditional DMARD monotherapy                   | Combination or triple traditional DMARD therapy | NA                                | NA          | NA          | 7.5-30 | 12             | no             | no          | yes           | 6 months                   | 6 months       |
| Pavelka 2009            | 141 | MTX experienced    | SD Biologic +/- Traditional DMARD               | HD Biologic +/- Traditional DMARD               | NA                                | NA          | NA          | n/a    | 13             | no             | no          | yes           | 12 months                  | 12 months      |
| Quinn 2005              | 20  | MTX naïve          | Traditional DMARD monotherapy                   | SD Biologic +/- Traditional DMARD               | NA                                | NA          | NA          | 7.5-30 | 0.5            | yes            | yes         | yes           | 12 months                  | 24 months      |
| Rau 2004                | 54  | MTX experienced    | Traditional DMARD monotherapy                   | LD Biologic +/- Traditional DMARD               | NA                                | NA          | NA          | 7.5-30 | 11.1           | no             | no          | yes           | 1 month                    | 1 month        |
| Rubbert-Roth 2010       | 378 | MTX experienced    | Traditional DMARD monotherapy                   | SD Biologic +/- Traditional DMARD               | LD Biologic +/- Traditional DMARD | NA          | NA          | 7.5-30 | 8.8            | yes            | no          | yes           | 11 months                  | 11 months      |
| Schiff 2008             | 431 | MTX experienced    | Traditional DMARD monotherapy                   | SD Biologic +/- Traditional DMARD               | NA                                | NA          | NA          | 7.5-30 | 7              | yes            | no          | yes           | 6 months                   | 12 months      |
| Smolen (GO-AFTER) 2009a | 461 | TNF experienced    | Traditional DMARD monotherapy                   | SD Biologic +/- Traditional DMARD               | HD Biologic +/- Traditional       | NA          | NA          | n/a    | 9.4            | no             | no          | yes           | 6 months                   | 6 months       |

| Author and Year                | N    | Patient Population | Treatment 1                       | Treatment 2                                     | Treatment 3                       | Treatment 4 | Treatment 5 | MTX    | Duration of RA | Biologic-naive | DMARD-naive | Mono-Biologic | TIME of Outcome abstracted | Trial Duration |
|--------------------------------|------|--------------------|-----------------------------------|-------------------------------------------------|-----------------------------------|-------------|-------------|--------|----------------|----------------|-------------|---------------|----------------------------|----------------|
| DMARD                          |      |                    |                                   |                                                 |                                   |             |             |        |                |                |             |               |                            |                |
| <b>Smolen (RAPID 2) 2008</b>   | 619  | MTX experienced    | Traditional DMARD monotherapy     | SD Biologic +/- Traditional DMARD               | HD Biologic +/- Traditional DMARD | NA          | NA          | 7.5-30 | 6              | no             | no          | yes           | 6 months                   | 12 months      |
| <b>Smolen 2008 (OPTION)</b>    | 623  | MTX experienced    | Traditional DMARD monotherapy     | SD Biologic +/- Traditional DMARD               | HD Biologic +/- Traditional DMARD | NA          | NA          | 7.5-30 | 7.6            | no             | no          | yes           | 4 months                   | 8 months       |
| <b>Smolen 2013</b>             | 604  | MTX experienced    | Traditional DMARD monotherapy     | SD Biologic +/- Traditional DMARD               | LD Biologic +/- Traditional DMARD | NA          | NA          | 7.5-30 | 6.9            | yes            | no          | yes           | 22 months                  | 22 months      |
| <b>St. Clair (ASPIRE) 2004</b> | 1040 | MTX naïve          | Traditional DMARD monotherapy     | SD Biologic +/- Traditional DMARD               | HD Biologic +/- Traditional DMARD | NA          | NA          | 7.5-30 | 0.8            | yes            | no          | yes           | 12 months                  | 12 months      |
| <b>Tacioglu 2003</b>           | 55   | MTX naïve          | Traditional DMARD monotherapy     | Combination or triple traditional DMARD therapy | NA                                | NA          | NA          | 7.5-30 | 0.6            | no             | no          | yes           | 12 months                  | 12 months      |
| <b>Tada (PRECEPT) 2012</b>     | 70   | DMARD experienced  | SD Biologic +/- Traditional DMARD | LD Biologic +/- Traditional DMARD               | NA                                | NA          | NA          | <=10   | 9              | no             | no          | yes           | 12 months                  | 12 months      |
| <b>Tak 2012</b>                | 748  | MTX naïve          | Traditional DMARD monotherapy     | SD Biologic +/- Traditional DMARD               | LD Biologic +/- Traditional DMARD | NA          | NA          | 7.5-30 | 0.9            | yes            | yes         | yes           | 24 months                  | 24 months      |
| <b>Takeuchi 2013</b>           | 316  | DMARD Experienced  | SD Biologic +/- Traditional DMARD | HD Biologic +/- Traditional DMARD               | Placebo                           | NA          | NA          | n/a    | 8.9            | no?            | no          | yes           | 4 months                   | 6 months       |
| <b>Takeuchi 2013b</b>          | 548  | DMARD Experienced  | Traditional DMARD monotherapy     | SD Biologic +/- Traditional DMARD               | HD Biologic +/- Traditional       | NA          | NA          | <=10   | 3              | yes?           | no          | yes           | 12 months                  | 12 months      |

| Author and Year           | N   | Patient Population | Treatment 1                                    | Treatment 2                          | Treatment 3                          | Treatment 4                          | Treatment 5 | MTX    | Duration of RA | Biologic-naive | DMARD-naive | Mono-Biologic | TIME of Outcome abstracted | Trial Duration |
|---------------------------|-----|--------------------|------------------------------------------------|--------------------------------------|--------------------------------------|--------------------------------------|-------------|--------|----------------|----------------|-------------|---------------|----------------------------|----------------|
| DMARD                     |     |                    |                                                |                                      |                                      |                                      |             |        |                |                |             |               |                            |                |
| Takeuchi 2014             | 334 | MTX naive          | Traditional DMARD monotherapy                  | SD Biologic +/- Traditional DMARD    | NA                                   | NA                                   | NA          | <=10   | 0.3            | yes            | yes         | yes           | 6 months                   | 6 months       |
| Tanaka (GO-FORTH) 2012    | 269 | MTX experienced    | Traditional DMARD monotherapy                  | SD Biologic +/- Traditional DMARD    | HD Biologic +/- Traditional DMARD    | NA                                   | NA          | <=10   | 8.6            | yes            | no          | yes           | 3 months                   | 6 months       |
| Tanaka 2011               | 112 | MTX experienced    | Traditional DMARD monotherapy                  | SD Tofacitinib +/- Traditional DMARD | LD Tofacitinib +/- Traditional DMARD | HD Tofacitinib +/- Traditional DMARD | NA          | <=10   | 7.6            | no             | no          | yes           | 3 months                   | 3 months       |
| Tugwell 1995              | 148 | MTX experienced    | Traditional DMARD monotherapy                  | MTX + non-MTX traditional DMARD      | NA                                   | NA                                   | NA          | 7.5-30 | 10.3           | no             | no          | yes           | 6 months                   | 6 months       |
| van de Putte 2003         | 284 | DMARD experienced  | SD Biologic +/- Traditional DMARD              | LD Biologic +/- Traditional DMARD    | HD Biologic +/- Traditional DMARD    | Placebo                              | NA          | no     | 10             | yes            | no          | yes           | 3 months                   | 3 months       |
| Van de Putte 2004         | 544 | DMARD experienced  | SD Biologic +/- Traditional DMARD              | LD Biologic +/- Traditional DMARD    | HD Biologic +/- Traditional DMARD    | Placebo                              | NA          | n/a    | 10.6           | yes            | no          | yes           | 6 months                   | 6 months       |
| van der Heijde 2013       | 718 | MTX experienced    | Traditional DMARD monotherapy                  | SD Tofacitinib +/- Traditional DMARD | HD Tofacitinib +/- Traditional DMARD | NA                                   | NA          | 7.5-30 | 9.1            | no             | no          | yes           | 12 months                  | 12 months      |
| Vollenhoven (SWEFOT) 2012 | 258 | MTX naive          | Combination or riple traditional DMARD therapy | SD Biologic +/- Traditional DMARD    | NA                                   | NA                                   | NA          | 7.5-30 | 0.5            | no             | yes         | yes           | 24 months                  | 24 months      |
| Vollenhoven 2012a         | 717 | MTX experienced    | Traditional DMARD                              | SD Biologic +/- Traditional DMARD    | HD Tofacitinib +/-                   | NA                                   | NA          | 7.5-30 | 7.8            | no             | no          | yes           | 3 months                   | 12 months      |

| Author and Year                | N    | Patient Population | Treatment 1                       | Treatment 2                       | Treatment 3                       | Treatment 4                       | Treatment 5 | MTX    | Duration of RA | Biologic-naive | DMARD-naive | Mono-Biologic | TIME of Outcome abstracted | Trial Duration |
|--------------------------------|------|--------------------|-----------------------------------|-----------------------------------|-----------------------------------|-----------------------------------|-------------|--------|----------------|----------------|-------------|---------------|----------------------------|----------------|
|                                |      |                    | monotherapy                       | DMARD                             | Traditional DMARD                 |                                   |             |        |                |                |             |               |                            |                |
| <b>Weinblatt (Go FURTHER)</b>  | 592  | MTX experienced    | Traditional DMARD monotherapy     | SD Biologic +/- Traditional DMARD | NA                                | NA                                | NA          | 7.5-30 | 7              | yes            | no          | yes           | 6 months                   | 6 months       |
| <b>Weinblatt 1999</b>          | 89   | MTX experienced    | Traditional DMARD monotherapy     | SD Biologic +/- Traditional DMARD | NA                                | NA                                | NA          | 7.5-30 | 13             | yes            | no          | yes           | 6 months                   | 6 months       |
| <b>Weinblatt 2003</b>          | 271  | DMARD experienced  | Traditional DMARD monotherapy     | SD Biologic +/- Traditional DMARD | LD Biologic +/- Traditional DMARD | HD Biologic +/- Traditional DMARD | NA          | 7.5-30 | 12.2           | yes            | no          | yes           | 6 months                   | 6 months       |
| <b>Weinblatt 2006</b>          | 121  | TNF experienced    | SD Biologic +/- Traditional DMARD | Combination Biologic              | NA                                | NA                                | NA          | n/a    | 12.9           | no             | no          | no            | 12 months                  | 12 months      |
| <b>Weinblatt 2006</b>          | 1377 | TNF experienced    | Traditional DMARD monotherapy     | SD Biologic +/- Traditional DMARD | Combination Biologic              | NA                                | NA          | 7.5-30 | 11.3           | no             | no          | yes           | 12 months                  | 12 months      |
| <b>Weinblatt 2008</b>          | 200  | TNF experienced    | SD Biologic +/- Traditional DMARD | HD Biologic +/- Traditional DMARD | NA                                | NA                                | NA          | 7.5-30 | 10             | no             | no          | yes           | 3 months                   | 3 months       |
| <b>Weinblatt 2012</b>          | 1063 | DMARD Experienced  | Traditional DMARD monotherapy     | HD Biologic +/- Traditional DMARD | NA                                | NA                                | NA          | n/a    | 8.7            | no?            | no          | yes           | 3 months                   | 3 months       |
| <b>Weisman 2007</b>            | 535  | DMARD experienced  | Traditional DMARD monotherapy     | SD Biologic +/- Traditional DMARD | NA                                | NA                                | NA          | 7.5-30 | 10.1           | yes            | no          | yes           | 4 months                   | 4 months       |
| <b>Westhovens (START) 2006</b> | 1084 | MTX experienced    | Traditional DMARD monotherapy     | SD Biologic +/- Traditional DMARD | HD Biologic +/- Traditional DMARD | NA                                | NA          | 7.5-30 | 7.5            | yes            | no          | yes           | 5 months                   | 24 months      |
| <b>Westhovens 2009a</b>        | 509  | MTX naïve          | Traditional DMARD monotherapy     | SD Biologic +/- Traditional DMARD | NA                                | NA                                | NA          | 7.5-30 | 0.5            | no             | no          | yes           | 12 months                  | 24 months      |

| Author and Year | N   | Patient Population | Treatment 1                   | Treatment 2                       | Treatment 3 | Treatment 4 | Treatment 5 | MTX    | Duration of RA | Biologic-naive | DMARD-naive | Mono-Biologic | TIME of Outcome abstracted | Trial Duration |
|-----------------|-----|--------------------|-------------------------------|-----------------------------------|-------------|-------------|-------------|--------|----------------|----------------|-------------|---------------|----------------------------|----------------|
| Williams 1992   | 220 | MTX naïve          | Traditional DMARD monotherapy | MTX + non-MTX traditional DMARD   | NA          | NA          | NA          | 7.5-30 | 0.9            | no             | no          | yes           | 6 months                   | 6 months       |
| Yazici 2012     | 619 | DMARD experienced  | Traditional DMARD monotherapy | HD Biologic +/- Traditional DMARD | NA          | NA          | NA          | n/a    | 8.5            | no             | no          | yes           | 4 months                   | 6 months       |

**Appendix 5 (on line):** Risk of Bias assessment; + = low risk of bias; - = high risk of bias; ? = unclear risk of bias

|                         | Random sequence generation | Allocation concealment | Blinding of assessor | Blinding of participants | Incomplete outcome data | Selective reporting | Major baseline imbalance | Funding source | Risk of Bias |
|-------------------------|----------------------------|------------------------|----------------------|--------------------------|-------------------------|---------------------|--------------------------|----------------|--------------|
| <b>Abe 2006</b>         | ?                          | ?                      | ?                    | ?                        | +                       | +                   | +                        | ?              | Unclear      |
| <b>Bathon 2000</b>      | ?                          | -                      | -                    | -                        | -                       | ?                   | +                        | +              | High         |
| <b>Breedveld 2006</b>   | ?                          | ?                      | +                    | +                        | -                       | ?                   | +                        | -              | Low          |
| <b>Burmester 2013</b>   | +                          | +                      | ?                    | ?                        | -                       | ?                   | +                        | -              | Low          |
| <b>Chen 2009</b>        | ?                          | ?                      | ?                    | ?                        | -                       | ?                   | +                        | ?              | Unclear      |
| <b>Combe 2009</b>       | ?                          | ?                      | ?                    | ?                        | -                       | +                   | -                        | -              | Unclear      |
| <b>Durez 2007</b>       | ?                          | ?                      | +                    | ?                        | +                       | +                   | +                        | ?              | Unclear      |
| <b>Emery 2006</b>       | ?                          | ?                      | ?                    | ?                        | -                       | -                   | +                        | -              | Unclear      |
| <b>Emery 2008a</b>      | ?                          | ?                      | ?                    | ?                        | -                       | +                   | +                        | -              | Unclear      |
| <b>Emery 2009</b>       | +                          | +                      | +                    | +                        | +                       | ?                   | +                        | ?              | Low          |
| <b>Fleischmann 2009</b> | +                          | ?                      | +                    | ?                        | -                       | +                   | +                        | -              | Unclear      |
| <b>Gabay 2013</b>       | +                          | +                      | ?                    | ?                        | -                       | ?                   | +                        | -              | Low          |
| <b>Genovese 2008</b>    | ?                          | ?                      | +                    | ?                        | -                       | ?                   | +                        | -              | Unclear      |
| <b>Greenwald 2011</b>   | ?                          | ?                      | ?                    | ?                        | -                       | ?                   | +                        | -              | Unclear      |
| <b>Jones 2010</b>       | ?                          | ?                      | ?                    | ?                        | -                       | ?                   | +                        | -              | Unclear      |
| <b>Kavanaugh 2013</b>   | +                          | +                      | ?                    | ?                        | -                       | ?                   | +                        | -              | Low          |
| <b>Kay 2008</b>         | ?                          | ?                      | +                    | +                        | -                       | ?                   | +                        | -              | Low          |
| <b>Keystone 2004a</b>   | ?                          | ?                      | +                    | +                        | -                       | ?                   | +                        | -              | Low          |

|                          |   |   |   |   |   |   |   |   |         |
|--------------------------|---|---|---|---|---|---|---|---|---------|
| <b>Keystone 2008</b>     | ? | ? | + | ? | + | + | + | - | Unclear |
| <b>Keystone 2009</b>     | + | + | + | + | - | + | + | - | Low     |
| <b>Kim 2012</b>          | ? | ? | - | - | - | ? | + | - | High    |
| <b>Kremer 2005</b>       | + | + | ? | ? | - | + | + | - | Low     |
| <b>Kremer 2010</b>       | + | + | ? | + | - | ? | + | - | Low     |
| <b>Lan 2004</b>          | ? | ? | ? | ? | - | - | + | - | Unclear |
| <b>Maini 1999</b>        | + | + | ? | ? | - | + | + | - | Low     |
| <b>Maini 2006</b>        | + | + | + | + | - | + | + | - | Low     |
| <b>Nishimoto 2007</b>    | + | + | - | - | - | ? | + | - | High    |
| <b>Nishimoto 2009</b>    | ? | ? | ? | ? | - | ? | + | - | Unclear |
| <b>Pavelka 2009</b>      | ? | ? | ? | ? | - | ? | + | + | Unclear |
| <b>Putte 2003</b>        | ? | ? | ? | ? | - | ? | + | - | Unclear |
| <b>Rubbert-Roth 2010</b> | + | + | ? | ? | - | ? | + | - | Low     |
| <b>Smolen 2008</b>       | + | + | + | ? | - | ? | + | - | Low     |
| <b>Smolen 2009</b>       | ? | ? | - | - | ? | + | + | - | High    |
| <b>Smolen 2009a</b>      | + | + | + | + | - | ? | + | - | Low     |
| <b>Smolen 2013</b>       | + | + | - | - | - | ? | + | - | High    |
| <b>St. Clair 2004</b>    | + | + | - | - | - | + | + | - | High    |
| <b>Tada 2012</b>         | + | + | - | - | ? | ? | + | - | High    |
| <b>Tak 2012</b>          | ? | ? | ? | ? | - | ? | + | - | Unclear |
| <b>Tanaka 2011</b>       | ? | ? | ? | ? | - | ? | + | - | Unclear |
| <b>Tanaka 2012</b>       | ? | ? | ? | ? | - | ? | + | - | Unclear |



|                                   |   |   |   |   |   |   |   |   |         |
|-----------------------------------|---|---|---|---|---|---|---|---|---------|
| <b>Vollenhoven 2012</b>           | + | + | - | - | + | ? | + | - | High    |
| <b>Vollenhoven 2012a</b>          | + | + | ? | ? | - | ? | + | - | Low     |
| <b>Weinblatt 2008</b>             | ? | ? | ? | ? | - | ? | + | - | Unclear |
| <b>Weinblatt 2013</b>             | + | + | ? | ? | - | ? | + | - | Low     |
| <b>Weisman 2007</b>               | ? | ? | ? | ? | - | ? | + | - | Unclear |
| <b>Westhovens 2006</b>            | + | ? | + | + | - | + | + | - | Low     |
| <b>Westhovens 2009a</b>           | ? | ? | ? | ? | - | + | + | - | Unclear |
| <b>Yazici 2012</b>                | ? | ? | ? | ? | - | ? | + | - | Unclear |
| <b>Dougados 1999</b>              | ? | ? | + | ? | + | ? | + | - | Unclear |
| <b>Haagsma 1997</b>               | + | ? | ? | + | + | ? | - | - | Unclear |
| <b>Hetland 2006</b>               | + | + | + | + | + | ? | - | - | Low     |
| <b>Ichikawa 2005</b>              | ? | ? | ? | + | + | ? | + | - | Unclear |
| <b>Marchesoni 2003</b>            | + | ? | ? | - | + | ? | + | + | High    |
| <b>O'Dell 2006</b>                | + | + | ? | ? | - | ? | + | ? | Low     |
| <b>Tacioglu 2003</b>              | ? | - | ? | - | - | ? | + | ? | High    |
| <b>Williams 1992</b>              | + | ? | ? | + | ? | ? | + | + | Unclear |
| <b>Moreland 2012</b>              | + | + | + | + | + | ? | - | - | Low     |
| <b>de Jong 2013</b>               | + | ? | + | - | + | ? | - | - | High    |
| <b>Keystone (GO-FORWARD) 2010</b> | + | + | + | + | + | ? | ? | - | Low     |
| <b>Lipsky 2000</b>                | ? | ? | + | - | - | ? | + | - | High    |
| <b>Emery (SERENE)</b>             | ? | ? | ? | ? | + | ? | + | - | Unclear |

|                                |   |   |   |   |   |   |   |   |         |
|--------------------------------|---|---|---|---|---|---|---|---|---------|
| <b>2010a</b>                   |   |   |   |   |   |   |   |   |         |
| <b>van der Heijde 2013</b>     | + | ? | + | + | + | ? | + | - | Low     |
| <b>Rau 2004</b>                | ? | ? | ? | ? | + | ? | + | - | Unclear |
| <b>Kremer 2012</b>             | ? | ? | ? | + | + | ? | + | - | Unclear |
| <b>Kremer 2010</b>             | ? | ? | + | + | + | ? | + | - | Low     |
| <b>O'Dell 2013</b>             | ? | ? | + | ? | - | ? | + | - | Unclear |
| <b>Haagsma 1994</b>            | ? | ? | - | - | + | ? | + | ? | High    |
| <b>Kremer 2002</b>             | + | + | + | + | + | ? | + | - | Low     |
| <b>Hanyu 1999</b>              | ? | ? | - | - | - | ? | + | ? | High    |
| <b>Ogrendik 2007</b>           | ? | ? | ? | ? | + | ? | + | ? | Unclear |
| <b>Tugwell 1995</b>            | ? | ? | + | + | + | ? | + | - | Low     |
| <b>O'Dell 1996</b>             | + | + | + | + | - | ? | + | - | Low     |
| <b>Weinblatt (Aug.) 2006</b>   | + | + | + | + | - | ? | + | - | Low     |
| <b>Cohen 2006</b>              | ? | ? | + | + | - | + | + | - | Low     |
| <b>Weinblatt (Sept.) 2006</b>  | ? | ? | ? | ? | ? | ? | - | - | Unclear |
| <b>Kremer 2009</b>             | ? | ? | ? | ? | + | ? | + | - | Unclear |
| <b>Heijde (TEMPO) 2007</b>     | ? | ? | + | + | - | - | + | - | Low     |
| <b>Flesichmann (Aug.) 2012</b> | + | + | ? | ? | ? | ? | - | - | Low     |
| <b>Bresnihan 1998</b>          | ? | ? | + | + | + | ? | + | - | Low     |
| <b>Flesichmann</b>             | ? | ? | ? | + | + | ? | + | - | Unclear |

| <b>(March) 2012</b>           |   |   |   |   |   |   |   |   |         |
|-------------------------------|---|---|---|---|---|---|---|---|---------|
| <b>Weinblatt 2012</b>         | + | ? | ? | ? | + | ? | + | - | Unclear |
| <b>Choy 2012</b>              | + | ? | + | + | - | ? | + | - | Low     |
| <b>Kaine 2011</b>             | ? | ? | ? | + | + | ? | + | - | Unclear |
| <b>Kremer 2013</b>            | ? | ? | ? | ? | + | ? | - | - | Unclear |
| <b>Takeuchi 2013</b>          | ? | ? | + | + | - | ? | + | - | Low     |
| <b>Takeuchi 2013b</b>         | + | + | + | + | + | ? | + | - | Low     |
| <b>Takeuchi 2014</b>          | ? | ? | + | + | + | ? | + | - | Low     |
| <b>Conaghan 2013</b>          | + | + | + | + | + | ? | + | - | Low     |
| <b>Detert 2013</b>            | ? | ? | + | + | + | ? | + | - | Low     |
| <b>Bejarano 2008</b>          | + | + | + | + | + | ? | + | - | Low     |
| <b>Quinn 2005</b>             | + | + | ? | + | ? | ? | - | - | Low     |
| <b>Cohen 2004</b>             | ? | ? | + | ? | + | ? | + | - | Unclear |
| <b>Edwards 2004</b>           | ? | ? | ? | + | + | - | + | - | Unclear |
| <b>Schiff 2008</b>            | ? | ? | + | + | + | ? | + | - | Low     |
| <b>Emery 2008<br/>(COMET)</b> | + | + | + | + | - | ? | + | - | Low     |
| <b>Kremer 2006</b>            | + | + | ? | + | + | ? | + | - | Low     |
| <b>Cohen 2002</b>             | ? | ? | + | ? | ? | ? | + | - | Unclear |
| <b>Genovese 2004</b>          | ? | ? | + | + | + | ? | + | - | Low     |
| <b>Weinblatt 1999</b>         | ? | ? | + | ? | + | ? | + | - | Unclear |
| <b>Genovese 2005</b>          | ? | ? | ? | + | + | ? | + | - | Unclear |
| <b>Furst 2003</b>             | ? | ? | + | ? | + | ? | + | - | Unclear |

|                          |   |   |   |   |   |   |   |   |         |
|--------------------------|---|---|---|---|---|---|---|---|---------|
| <b>Miyasaka 2008</b>     | ? | ? | ? | ? | + | + | ? | - | Unclear |
| <b>Van De Putte 2004</b> | + | ? | ? | ? | - | + | + | - | Unclear |
| <b>Flesichmann 2003</b>  | ? | ? | + | + | + | + | + | - | Low     |
| <b>Kim 2007</b>          | ? | ? | ? | ? | - | - | + | - | Unclear |
| <b>Weinblatt 2003</b>    | ? | ? | ? | + | + | + | + | - | Unclear |

+ = low risk of bias  
- = high risk of bias  
? = unclear risk of bias

**Appendix 6 (on line):** Summary of findings from traditional meta-analyses on risk of serious infection for standard dose biologics (Odds ratios (95% CI)) in rheumatoid arthritis

|                                                                | All Populations  | Traditional DMARD naïve | Traditional DMARD experienced | TNF Experienced  |
|----------------------------------------------------------------|------------------|-------------------------|-------------------------------|------------------|
| <b>All standard dose biologics</b>                             | 1.27(1.05,1.52)  | 1.05(0.76,1.45)         | 1.43(1.11,1.83)               | 1.21(0.71,2.08)  |
| <b>Biologic +/- traditional DMARD</b>                          |                  |                         |                               |                  |
| <b>Abatacept</b>                                               | 1.26(0.75,2.11)  | 0.99(0.28,3.46)         | 1.19(0.47,3.05)               | 1.41(0.67,2.90)  |
| <b>Adalimumab</b>                                              | 1.86(1.15,3.01)  | 1.52(0.82,2.80)         | 2.55(1.16,5.66)               | NA               |
| <b>Anakinra</b>                                                | 2.71(0.86,8.57)  | NA                      | 2.71(0.86,8.57)               | NA               |
| <b>Certolizumab</b>                                            | 3.61(1.31,9.99)  | NA                      | 3.61(1.31,9.99)               | NA               |
| <b>Etanercept</b>                                              | 0.97(0.60,1.57)  | 0.60(0.2,1.80)          | 1.08(0.64,1.85)               | NA               |
| <b>Golimumab</b>                                               | 1.14(0.41,3.11)  | 0.67(0.08,5.63)         | 1.71(0.34,8.67)               | 1.01(0.2,5.10)   |
| <b>Infliximab</b>                                              | 1.33(0.78,2.28)  | 2.71(1.11,6.62)         | 0.76(0.37,1.57)               | NA               |
| <b>Rituximab</b>                                               | 0.75(0.44,1.26)  | 0.62(0.29,1.30)         | 0.70(0.28,1.73)               | 1.58(0.40,6.19)  |
| <b>Tocilizumab</b>                                             | 1.35(0.66,2.75)  | NA                      | 1.81(0.77,4.22)               | 0.58(0.14,2.47)  |
| <b>Anti-TNF vs non-TNF biologic</b>                            |                  |                         |                               |                  |
| <b>Anti-TNF biologic</b>                                       | 1.34(1.06,1.69)  | 1.21(0.83,1.77)         | 1.44(1.07,1.94)               | 1.01(0.2,5.10)   |
| <b>Non-TNF biologic</b>                                        | 1.15(0.85,1.56)  | 0.7(0.37,1.32)          | 1.40(0.89,2.18)               | 1.24(0.70,2.20)  |
| <b>Duration of follow-up</b>                                   |                  |                         |                               |                  |
| <b>Less than 6 months</b>                                      | 1.07(0.66,1.73)  | NA                      | 1.16(0.69,1.94)               | 0.58(0.14,2.47)  |
| <b>6 to 12 months</b>                                          | 1.59(1.15,2.19)  | 1.37(0.70,2.71)         | 1.77(1.18,2.67)               | 1.21(0.53,2.79)  |
| <b>Greater than or equal to 12 months</b>                      | 1.14(0.88,1.47)  | 0.97(0.67,1.40)         | 1.28(0.86,1.92)               | 1.55(0.66,3.66)  |
| <b>Duration of Rheumatoid arthritis</b>                        |                  |                         |                               |                  |
| <b>Early RA - less than 2 years</b>                            | 1.07(0.77,1.48)  | 1.07(0.77,1.49)         | 1.00(0.06,16.79)              | NA               |
| <b>Established RA - 2 to 10 years</b>                          | 1.35(1.02,1.77)  | 0.67(0.15,3.02)         | 1.39(1.05,1.85)               | 1.01(0.2,5.10)   |
| <b>Late RA - greater than 10 years</b>                         | 1.418(0.96,2.07) | NA                      | 1.57(0.93,2.63)               | 1.24(0.70,2.20)  |
| <b>Biologic Monotherapy</b>                                    |                  |                         |                               |                  |
| <b>Biologic used in combination with Traditional DMARD</b>     | 1.34(1.09,1.69)  | 1.17(0.82,1.67)         | 1.47(1.12,1.92)               | 1.21(0.71,2.083) |
| <b>Biologic not used in combination with Traditional DMARD</b> | 0.89(0.54,1.48)  | 0.61(0.27,1.34)         | 1.18(0.60,2.34)               | NA               |
| <b>Traditional DMARD monotherapy vs. combination therapy</b>   |                  |                         |                               |                  |
| <b>Traditional DMARD monotherapy</b>                           | 1.27(1.05,1.52)  | 1.05(0.76,1.45)         | 1.43 (1.11,1.84)              | 1.21(0.71,2.08)  |
| <b>Traditional DMARD combination or triple therapy*</b>        | 1.85(0.85,4.10)  | 1.21(0.38,3.79)         | 2.68(0.88,8.23)               | NA               |
| <b>Year of study</b>                                           |                  |                         |                               |                  |
| <b>1995-1999</b>                                               | 1.59(0.29,8.79)  | NA                      | 1.59(0.29,8.79)               | NA               |
| <b>2000-2004</b>                                               | 1.63(1.07,2.48)  | 1.54(0.80,2.96)         | 1.69(0.98,2.93)               | NA               |

|                                                                                                                                        |                 |                 |                  |                  |
|----------------------------------------------------------------------------------------------------------------------------------------|-----------------|-----------------|------------------|------------------|
| <b>2005-2009</b>                                                                                                                       | 1.22(0.95,1.56) | 0.85(0.50,1.45) | 1.39(1.002,1.93) | 1.21(0.71,2.08)  |
| <b>2010-2014</b>                                                                                                                       | 1.11(0.76,1.62) | 1.00(0.60,1.67) | 1.25(0.71,2.20)  | NA               |
| <b>Risk of Bias</b>                                                                                                                    |                 |                 |                  |                  |
| <b>Studies with low risk of bias</b>                                                                                                   | 1.31(1.02,1.69) | 1.05(0.66,1.67) | 1.43(1.01,2.03)  | 1.46(0.75,2.81)  |
| <b>Studies with high risk of bias</b>                                                                                                  | 1.34(0.80,2.25) | 1.54(0.80,2.96) | 1.50(1.02,2.22)  | NA               |
| <b>Studies with unclear risk of bias</b>                                                                                               | 1.18(0.87,1.61) | 0.74(0.40,1.38) | 1.05(0.45,2.48)  | 0.78(0.29,2.09)  |
| <b>Use of corticosteroids</b>                                                                                                          |                 |                 |                  |                  |
| <b>Remove RCTs, with greater than 5% difference in proportion of patients using corticosteroids between arms or do not report data</b> | 1.44(1.12,1.85) | 1.20(0.82,1.77) | 1.65(1.13,2.40)  | 1.56 (0.75,3.22) |
| <b>Remove RCTs with greater than 10% difference in proportion of patients using corticosteroids between arms or do not report data</b> | 1.27(1.01,1.61) | 1.20(0.82,1.77) | 1.34(0.96,1.87)  | 1.24(0.70,2.20)  |

\* Studies using Traditional DMARD combination or triple therapy are not included in other calculations because they are treated as separate nodes in evidence network CI= confidence interval; DMARD= disease-modifying antirheumatic drugs; MTX= methotrexate; TNF= Tumor necrosis factors; NA=not available

**Appendix 6a.** Forest plot for traditional meta-analyses on risk of serious infection for stand dose biologics (Odds ratios (95% CI)) in rheumatoid arthritis

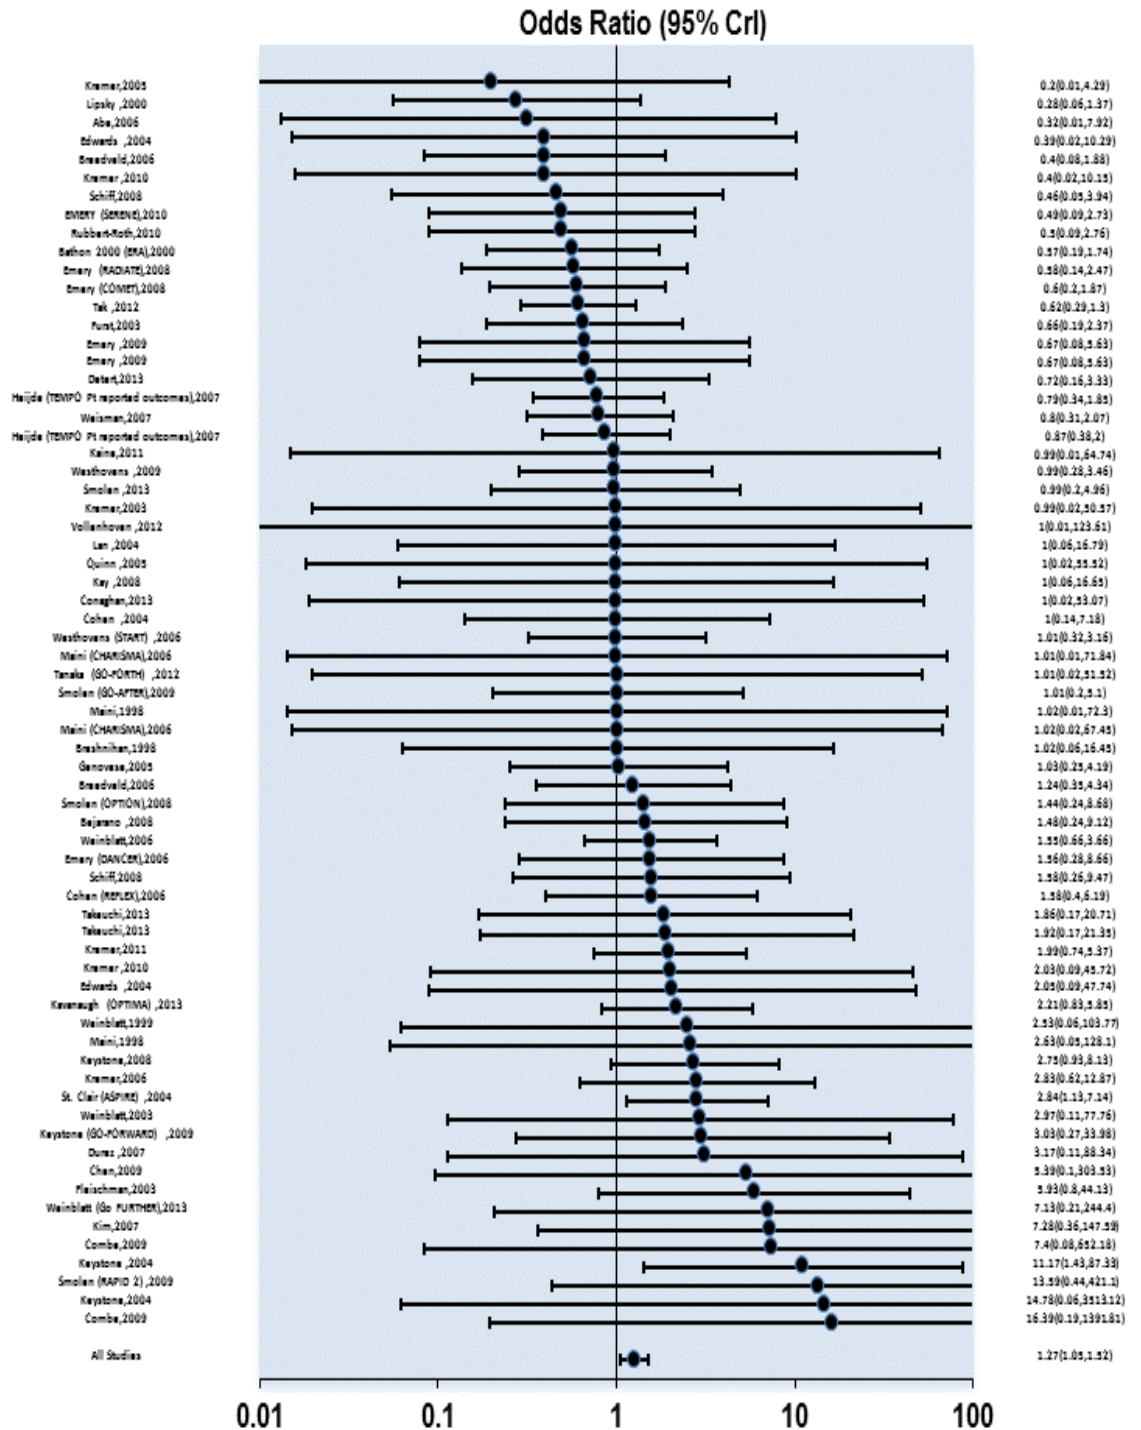

**Appendix 7 (on line):** Summary of sensitivity analyses for Bayesian network meta-analysis (95% Credible interval)

We did not exclude double/multiple zeroes cells from the Primary analysis to provide analytic consistency and because exclusion may cause an artificial small increase the effect size of serious infection.<sup>2</sup> Since treatment arms within some studies have differential sample size, we did not apply a constant 0.5 continuity correction, which would have biased estimates but instead applied an adjusted continuity correction factor centered around 0.5 and accounting for differential sample sizes among the arms.<sup>1</sup> Further, we conducted numerous analyses to ensure robustness of results irrespective of how zeroes were handled.<sup>1</sup> Results were similar using a variety of statistical methods:

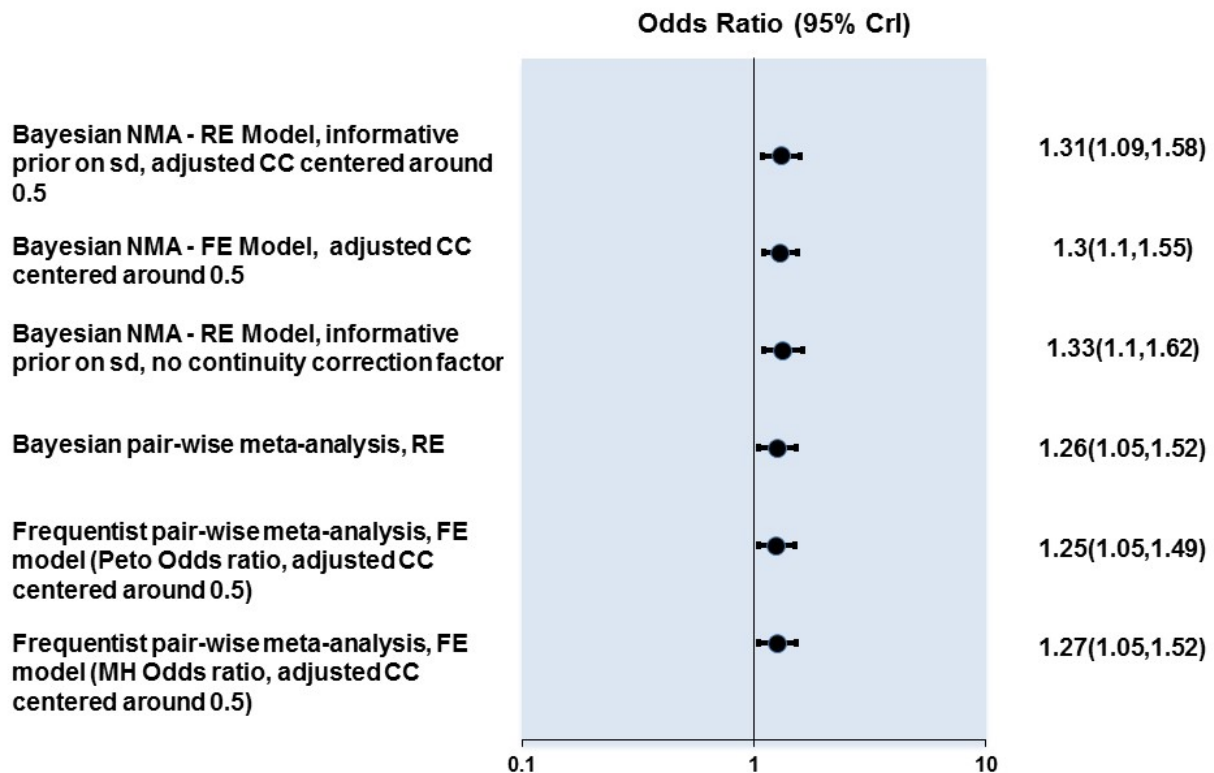

CC= continuity correction; FE= fixed-effects; MH= Mantel–Haenszel; NMA= network meta-analysis; RE= random-effects; sd= standard deviation



**Appendix 8 (on line):** Comparison of fixed versus random-effects model of therapies compared to traditional DMARD therapy, using Bayesian network meta-analysis (95% Credible interval)

|                                                                                          | <b>Fixed-effects model</b> | <b>Random-Effects model</b> |
|------------------------------------------------------------------------------------------|----------------------------|-----------------------------|
| <b>Combination or triple traditional DMARD therapy vs. Traditional DMARD monotherapy</b> | 0.85<br>(0.48,1.47)        | 0.84<br>(0.48,1.48)         |
| <b>SD Biologic +/- Traditional DMARD vs. Traditional DMARD monotherapy</b>               | 1.3<br>(1.1,1.55)          | 1.31<br>(1.09,1.58)         |
| <b>LD Biologic +/- Traditional DMARD vs. Traditional DMARD monotherapy</b>               | 0.94<br>(0.66,1.33)        | 0.93<br>(0.65,1.33)         |
| <b>HD Biologic +/- Traditional DMARD vs. Traditional DMARD monotherapy</b>               | 1.88<br>(1.51,2.34)        | 1.9<br>(1.5,2.39)           |
| <b>Combination Biologic vs. Traditional DMARD monotherapy</b>                            | 4.05<br>(1.89,8.42)        | 4.14<br>(1.87,9.05)         |

DMARD= disease-modifying antirheumatic drugs; HD= high dose; LD= low dose; SD= standard dose; DIC, deviance information criterion

\* Model includes double zero cells rather than excluding double zeroes, which may inflate serious infection risk estimates. However, inclusion of double zeroes also artificially improves the model fit statistics

**Appendix 9 (on line):** Summary of findings from Bayesian network meta-analyses (NMA) on the risk of serious infection (Odds ratios (95% CrI) for all doses of biologics in rheumatoid arthritis\*

|                                                                    | <b>All Populations<br/>(106 Studies;<br/>N=42,330)</b> | <b>MTX naïve<br/>(24 Studies;<br/>N=8,775)</b> | <b>MTX experienced<br/>(71 Studies;<br/>N=29,167)</b> | <b>TNF Experienced<br/>(11 Studies;<br/>N=4,788)</b> |
|--------------------------------------------------------------------|--------------------------------------------------------|------------------------------------------------|-------------------------------------------------------|------------------------------------------------------|
| <b>Compared to traditional DMARD monotherapy</b>                   |                                                        |                                                |                                                       |                                                      |
| MTX + non-MTX traditional DMARD                                    | 0.84(0.48,1.48)                                        | 0.99(0.44,2.14)                                | 0.73(0.3,1.69)                                        | NA                                                   |
| SD Biologic +/- Traditional DMARD                                  | <b>1.31(1.09,1.58)</b>                                 | 1.08(0.75,1.53)                                | <b>1.48(1.17,1.9)</b>                                 | 1.17(0.65,2.18)                                      |
| LD Biologic +/- Traditional DMARD                                  | 0.93(0.65,1.33)                                        | 0.93(0.47,1.8)                                 | 0.99(0.61,1.58)                                       | NA                                                   |
| HD Biologic +/- Traditional DMARD                                  | <b>1.9(1.5,2.39)</b>                                   | 1.73(0.89,3.52)                                | <b>2.07(1.57,2.74)</b>                                | 1.53(0.68,3.51)                                      |
| Combination Biologic                                               | <b>4.14(1.87,9.05)</b>                                 | NA                                             | <b>69.52(2.89,580200)</b>                             | <b>3.08(1.09,8.51)</b>                               |
| Placebo                                                            | 0.57(0.19,1.28)                                        | NA                                             | 0.64(0.23,1.47)                                       | NA                                                   |
| <b>Compared to combination or triple traditional DMARD therapy</b> |                                                        |                                                |                                                       |                                                      |
| SD Biologic +/- Traditional DMARD                                  | 1.56(0.9,2.73)                                         | 1.08(0.5,2.54)                                 | 2.04(0.89,4.94)                                       | NA                                                   |
| LD Biologic +/- Traditional DMARD                                  | 1.11(0.59,2.14)                                        | 0.94(0.34,2.62)                                | 1.36(0.53,3.58)                                       | NA                                                   |
| HD Biologic +/- Traditional DMARD                                  | <b>2.26(1.26,4.07)</b>                                 | 1.73(0.66,5.09)                                | <b>2.83(1.2,7.01)</b>                                 | NA                                                   |
| Combination Biologic                                               | <b>4.94(1.88,12.77)</b>                                | NA                                             | <b>97.06(3.57,836800)</b>                             | NA                                                   |
| Placebo                                                            | 0.67(0.2,1.74)                                         | NA                                             | 0.87(0.23,2.92)                                       | NA                                                   |
| <b>Compared to SD Biologic +/- traditional DMARD</b>               |                                                        |                                                |                                                       |                                                      |
| LD Biologic +/- Traditional DMARD                                  | 0.71(0.5,1.01)                                         | 0.86(0.43,1.66)                                | 0.67(0.42,1.03)                                       | NA                                                   |
| HD Biologic +/- Traditional DMARD                                  | <b>1.45(1.16,1.81)</b>                                 | 1.59(0.84,3.2)                                 | <b>1.4(1.06,1.8)</b>                                  | 1.31(0.57,3)                                         |
| Combination Biologic                                               | <b>3.15(1.45,6.92)</b>                                 | NA                                             | <b>46.43(2,387900)</b>                                | 2.63(0.99,6.62)                                      |
| Placebo                                                            | 0.44(0.15,0.96)                                        | NA                                             | 0.43(0.16,0.96)                                       | NA                                                   |
| <b>Compared to LD Biologic +/- traditional DMARD</b>               |                                                        |                                                |                                                       |                                                      |
| HD Biologic +/- Traditional DMARD                                  | <b>2.03(1.38,3.02)</b>                                 | 1.86(0.76,4.81)                                | <b>2.09(1.31,3.43)</b>                                | NA                                                   |
| Combination Biologic                                               | <b>4.44(1.9,10.45)</b>                                 | NA                                             | <b>70.91(2.88,562000)</b>                             | NA                                                   |
| Placebo                                                            | 0.61(0.2,1.45)                                         | NA                                             | 0.64(0.23,1.54)                                       | NA                                                   |
| <b>Compared to HD Biologic +/- traditional DMARD</b>               |                                                        |                                                |                                                       |                                                      |
| Combination Biologic                                               | 2.18(0.96,4.92)                                        | NA                                             | <b>33.67(1.42,287000)</b>                             | 2(0.59,6.6)                                          |
| Placebo                                                            | <b>0.3(0.1,0.67)</b>                                   | NA                                             | <b>0.31(0.11,0.7)</b>                                 | NA                                                   |
| <b>Compared to Combination Biologic</b>                            |                                                        |                                                |                                                       |                                                      |
| Placebo                                                            | <b>0.14(0.04,0.43)</b>                                 | NA                                             | <b>0.01(0,0.25)</b>                                   | NA                                                   |

CrI= credible interval; DMARD= disease-modifying antirheumatic drugs; TNF= Tumor necrosis factors; NA=not available

\* Tofacitinib was included in the network to enhance precision of biologic effect estimates.

**Appendix 9a.** Summary of findings from Bayesian network meta-analyses on risk of serious infection (Odds ratios (95% CrI)) - All populations. Odds ratios for serious infections are calculated based on row-defining treatment versus column-defining treatment. To obtain ORs for comparisons in the opposite direction, reciprocals should be taken. Significant results are in bold.

|                                      |                                            |                                          |                                          |                                          |                                   |                |
|--------------------------------------|--------------------------------------------|------------------------------------------|------------------------------------------|------------------------------------------|-----------------------------------|----------------|
| <b>Traditional DMARD monotherapy</b> |                                            |                                          |                                          |                                          |                                   |                |
| 0.84<br>(0.48,1.48)                  | <b>Combination or triple DMARD therapy</b> |                                          |                                          |                                          |                                   |                |
| <b>1.31</b><br><b>(1.09,1.58)</b>    | 1.56<br>(0.9,2.73)                         | <b>SD Biologic +/- Traditional DMARD</b> |                                          |                                          |                                   |                |
| 0.93<br>(0.65,1.33)                  | 1.11<br>(0.59,2.14)                        | 0.71<br>(0.5,1.01)                       | <b>LD Biologic +/- Traditional DMARD</b> |                                          |                                   |                |
| <b>1.9</b><br><b>(1.5,2.39)</b>      | <b>2.26</b><br><b>(1.26,4.07)</b>          | <b>1.45</b><br><b>(1.16,1.81)</b>        | <b>2.03</b><br><b>(1.38,3.02)</b>        | <b>HD Biologic +/- Traditional DMARD</b> |                                   |                |
| <b>4.14</b><br><b>(1.87,9.05)</b>    | <b>4.94</b><br><b>(1.88,12.77)</b>         | <b>3.15</b><br><b>(1.45,6.92)</b>        | <b>4.44</b><br><b>(1.9,10.45)</b>        | 2.18<br>(0.96,4.92)                      | <b>Combination Biologic</b>       |                |
| 0.57<br>(0.19,1.28)                  | 0.67<br>(0.2,1.74)                         | <b>0.44</b><br><b>(0.15,0.96)</b>        | 0.61<br>(0.2,1.45)                       | <b>0.3</b><br><b>(0.1,0.67)</b>          | <b>0.14</b><br><b>(0.04,0.43)</b> | <b>Placebo</b> |

**Appendix 10 (on line):** Assessment of inconsistency

We plotted the posterior mean deviance of the individual data points in the inconsistency model against their posterior mean deviance in the consistency model to help identify loops where inconsistency is present. In our analysis, the posterior mean deviance contributions are very similar and close to 1, for both models. The consistency model has a lower posterior mean of the residual deviance (225.6 vs. 229.1 each versus 265) and DIC (1040.87 vs. 1048.45) and hence is a better fit. One point shows a lower value of the posterior mean deviance in the inconsistency model but these values are not too far from 1. This point is from the Fleishman 2012 study that compares different doses of tofacitinib with placebo.

**Appendix 10a- Plot of posterior mean deviance of the individual data points in the inconsistency model against their posterior mean deviance in the consistency model**

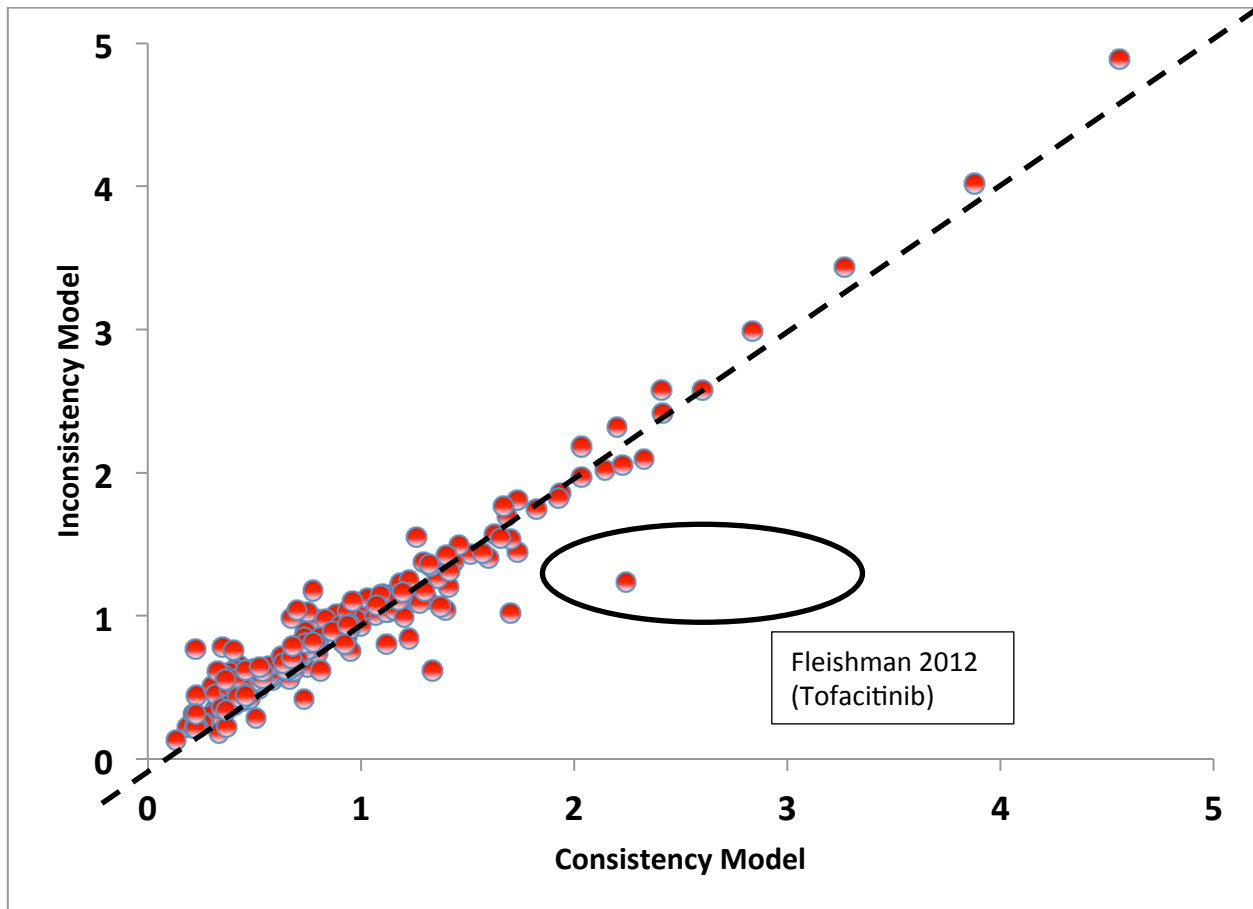

The effect estimates for Combination or triple traditional DMARD therapy vs Traditional DMARD monotherapy, SD Tofacitinib +/- Traditional DMARD vs Traditional DMARD monotherapy, HD Biologic +/- Traditional DMARD vs SD Biologic +/- Traditional DMARD, and Placebo vs SD Tofacitinib +/- Traditional DMARD are also on different sides of unity.

**Appendix 10b** - Comparison of effect estimates from consistency and inconsistency models where there were data available for comparison

| <u>Comparison</u>                                                                           | <u>Consistency Model</u> | <u>Inconsistency Model</u> |
|---------------------------------------------------------------------------------------------|--------------------------|----------------------------|
| <b>Combination or triple traditional DMARD therapy vs Traditional DMARD monotherapy</b>     | 0.84(0.48,1.48)          | 1.07(0.53,2.13)            |
| <b>SD Biologic +/- Traditional DMARD vs Traditional DMARD monotherapy</b>                   | <b>1.31(1.09,1.58)</b>   | <b>1.26(1.05,1.52)</b>     |
| <b>LD Biologic +/- Traditional DMARD vs Traditional DMARD monotherapy</b>                   | 0.93(0.65,1.33)          | 0.87(0.59,1.29)            |
| <b>HD Biologic +/- Traditional DMARD vs Traditional DMARD monotherapy</b>                   | <b>1.9(1.5,2.39)</b>     | <b>1.95(1.51,2.49)</b>     |
| <b>Combination Biologic vs Traditional DMARD monotherapy</b>                                | <b>4.14(1.87,9.05)</b>   | <b>3.06(1.02,7.81)</b>     |
| <b>SD Biologic +/- Traditional DMARD vs Combination or triple traditional DMARD therapy</b> | 1.56(0.90,2.73)          | 2.98(1.04,9.14)            |
| <b>LD Biologic +/- Traditional DMARD vs SD Biologic +/- Traditional DMARD</b>               | 0.71(0.50,1.01)          | 0.7(0.27,1.68)             |
| <b>HD Biologic +/- Traditional DMARD vs SD Biologic +/- Traditional DMARD</b>               | <b>1.45(1.16,1.81)</b>   | 1(0.54,1.82)               |
| <b>Combination Biologic vs SD Biologic +/- Traditional DMARD</b>                            | <b>3.15(1.45,6.92)</b>   | <b>12.42(1.98,378.8)</b>   |
| <b>Placebo vs SD Biologic +/- Traditional DMARD</b>                                         | 0.44(0.15,0.96)          | 0.26(0.07,0.74)            |

**Appendix 11(on line):** Summary of published meta-analyses assessing the risk of serious infection in patients with rheumatoid arthritis

| Study                      | No. of RCTs | No. of patients | Biologics considered in Study      | Search dates        | Population Considered |                 | TNF experienced | Conclusion                                                                                                        |
|----------------------------|-------------|-----------------|------------------------------------|---------------------|-----------------------|-----------------|-----------------|-------------------------------------------------------------------------------------------------------------------|
|                            |             |                 |                                    |                     | MTX naïve             | MTX experienced |                 |                                                                                                                   |
| <b>Bongartz 2006</b>       | 9           | 5,005           | Infliximab, adalimumab             | Up to December 2005 | Yes                   | Yes             | No              | Increased risk of serious infections in patients with rheumatoid arthritis treated with anti-TNF antibody therapy |
| <b>Salliot et al 2009</b>  | 12          | 6,879           | rituximab, abatacept, anakinra     | Up to October 2007  | Yes                   | Yes             | Yes             | No increased risk of serious infections in patients with rheumatoid arthritis treated with biologics              |
| <b>Leombruno 2008</b>      | 18          | 8,808           | Infliximab, adalimumab, etanercept | Up to December 2007 | Yes                   | Yes             | Yes             | No increased risk of serious infections in patients with rheumatoid arthritis treated with biologics              |
| <b>Thompson et al 2012</b> | 6           | 3,419           | Infliximab, adalimumab, etanercept | Up to August 2009   | Yes                   | No              | No              | No increased risk of serious infections in patients with rheumatoid arthritis treated with biologics              |

MTX=methotrexate; No= Number; RCT= randomized controlled trial; No= Number; TNF= tumor necrosis factor alpha

**Appendix 12 (on line):** Box-plots comparing characteristics of populations

**Duration of rheumatoid arthritis**

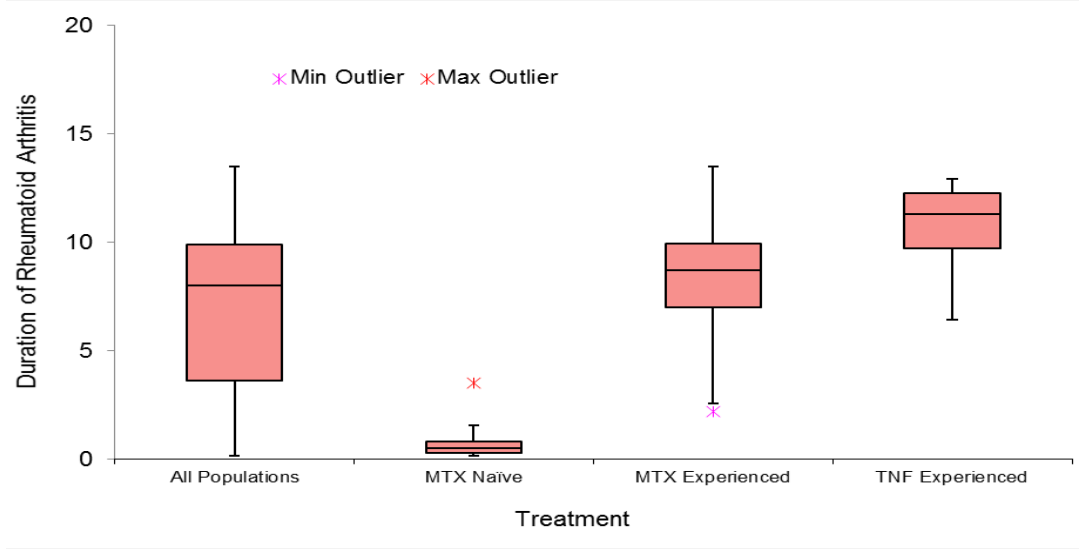

**Duration of follow-up**

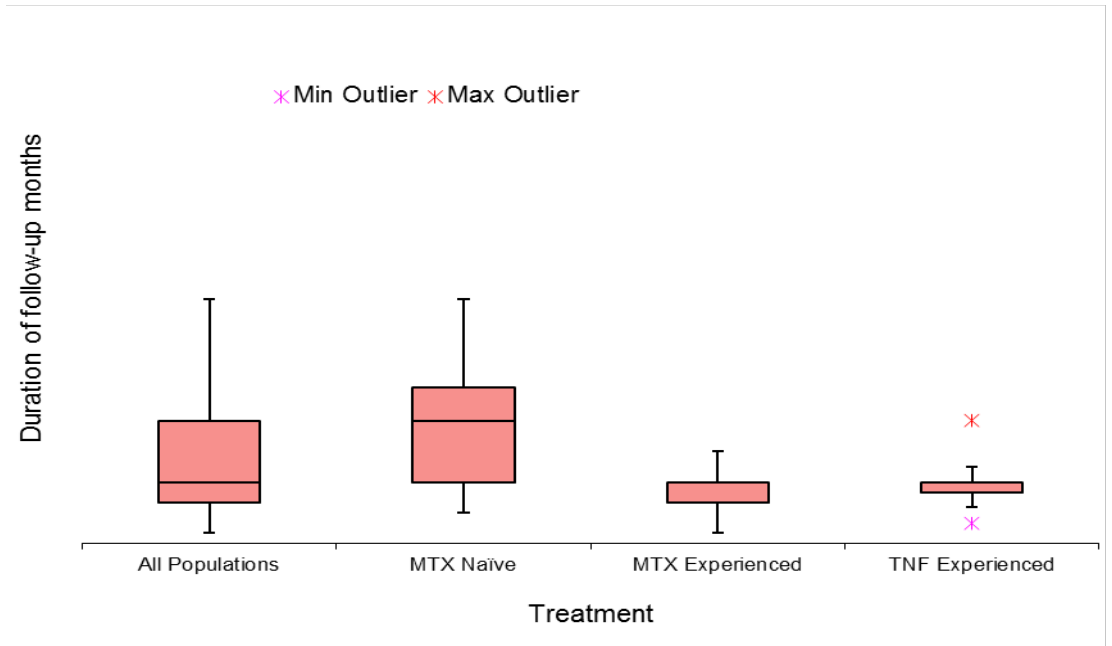

Supplement: NIHMS709423-supplement-01.pdf [file NIHMS709423-supplement-01.pdf]
